# Supplementary material for: Inhibition of histone deacetylation rescues phenotype in a mouse model of Birk-Barel intellectual disability syndrome
Source: Springer Nature journal article supplement (doi:10.1038/s41467-019-13918-4), 2020-01-24
Supplement: MOESM1 [file 41467_2019_13918_MOESM1_ESM.pdf]

**Supplementary Information**

**Inhibition of histone deacetylation rescues phenotype in a mouse model of Birk-Barel  
Intellectual Disability syndrome**

Cooper et al.

## Supplementary Figures

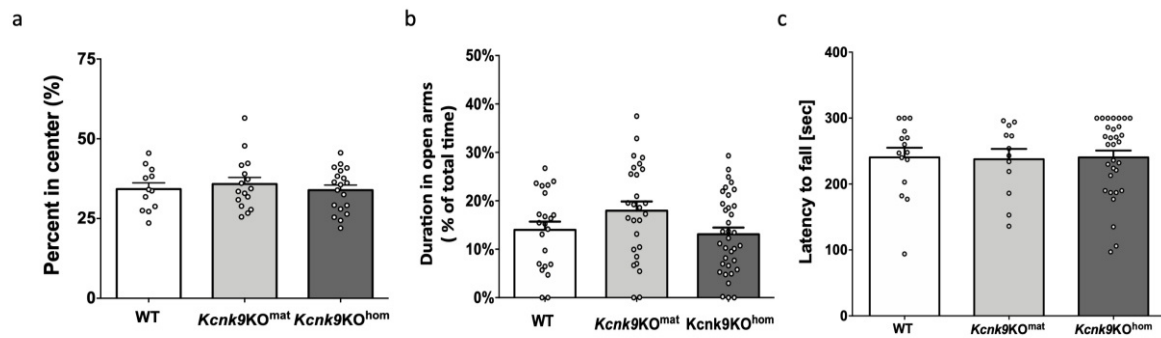

**Supplementary Figure 1: Deletion of *Kcnk9* does not affect anxiety and motor coordination of *Kcnk9*KO mice.** No significant differences were observed in (a) the open-field-test between WT (n=12), *Kcnk9*KO<sup>mat</sup> (n=16) and *Kcnk9*KO<sup>hom</sup> (n=19) mice, (b) the elevated-plus-maze between WT (n=22), *Kcnk9*KO<sup>mat</sup> (n=27) and *Kcnk9*KO<sup>hom</sup> (n=35) mice, and (c) the rotarod-test between WT (n=15), *Kcnk9*KO<sup>mat</sup> (n=12) and *Kcnk9*KO<sup>hom</sup> (n=31) mice using One-way ANOVA and followed Bonferroni's multiple comparison post hoc test. Values are means  $\pm$  SEM. (a-c) Behavioral data are from biologically independent animals (n= number of mice). Statistical analyses and approaches are provided in Supplementary Table 1. Source data are provided as a Source Data file.

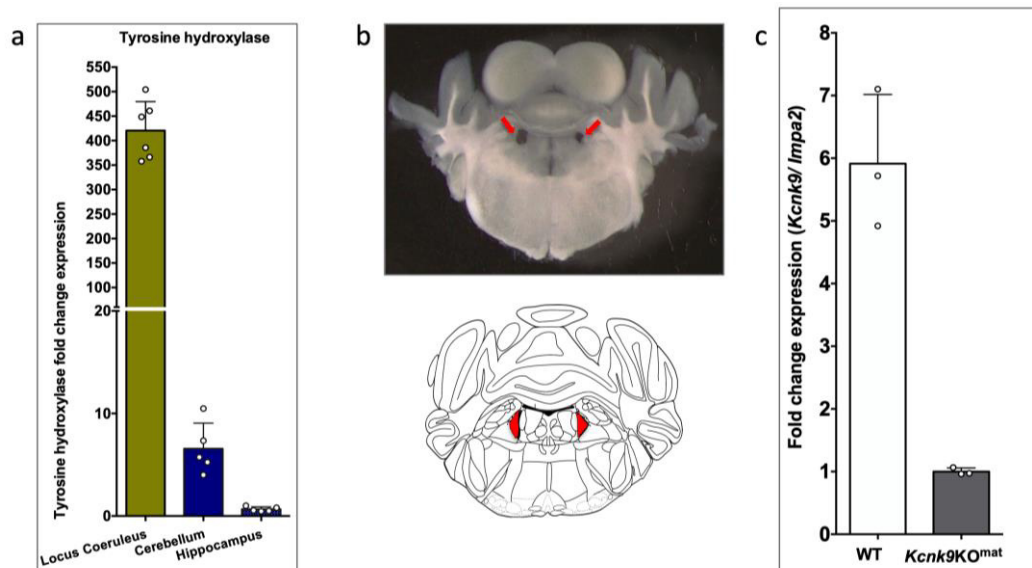

**Supplementary Figure 2: Locus coeruleus expression analysis** (a) Tyrosine hydroxylase (TH) RT-qPCR expression analysis. The TH expression was highly increased in locus coeruleus (LC, n=6) compared to cerebellum (n=5) and hippocampus (n=5) samples of WT mice. TH serves as a norepinephrine marker. (b) Coronal brain slice of an adult mouse; red arrows indicate tissue excision position of LC (top) schematic coronal section of the mouse brain at the position -5.4 relative to bregma<sup>1</sup>; LC is depicted as a red triangle (bottom) (c) *Kcnk9* RT-qPCR expression analysis in LC samples of WT (n=3) compared to those of *Kcnk9*KO<sup>mat</sup> (n=3) mice. (a,c) n= biologically independent samples from individual mice. Values are means  $\pm$  SEM. Source data are provided as a Source Data file.

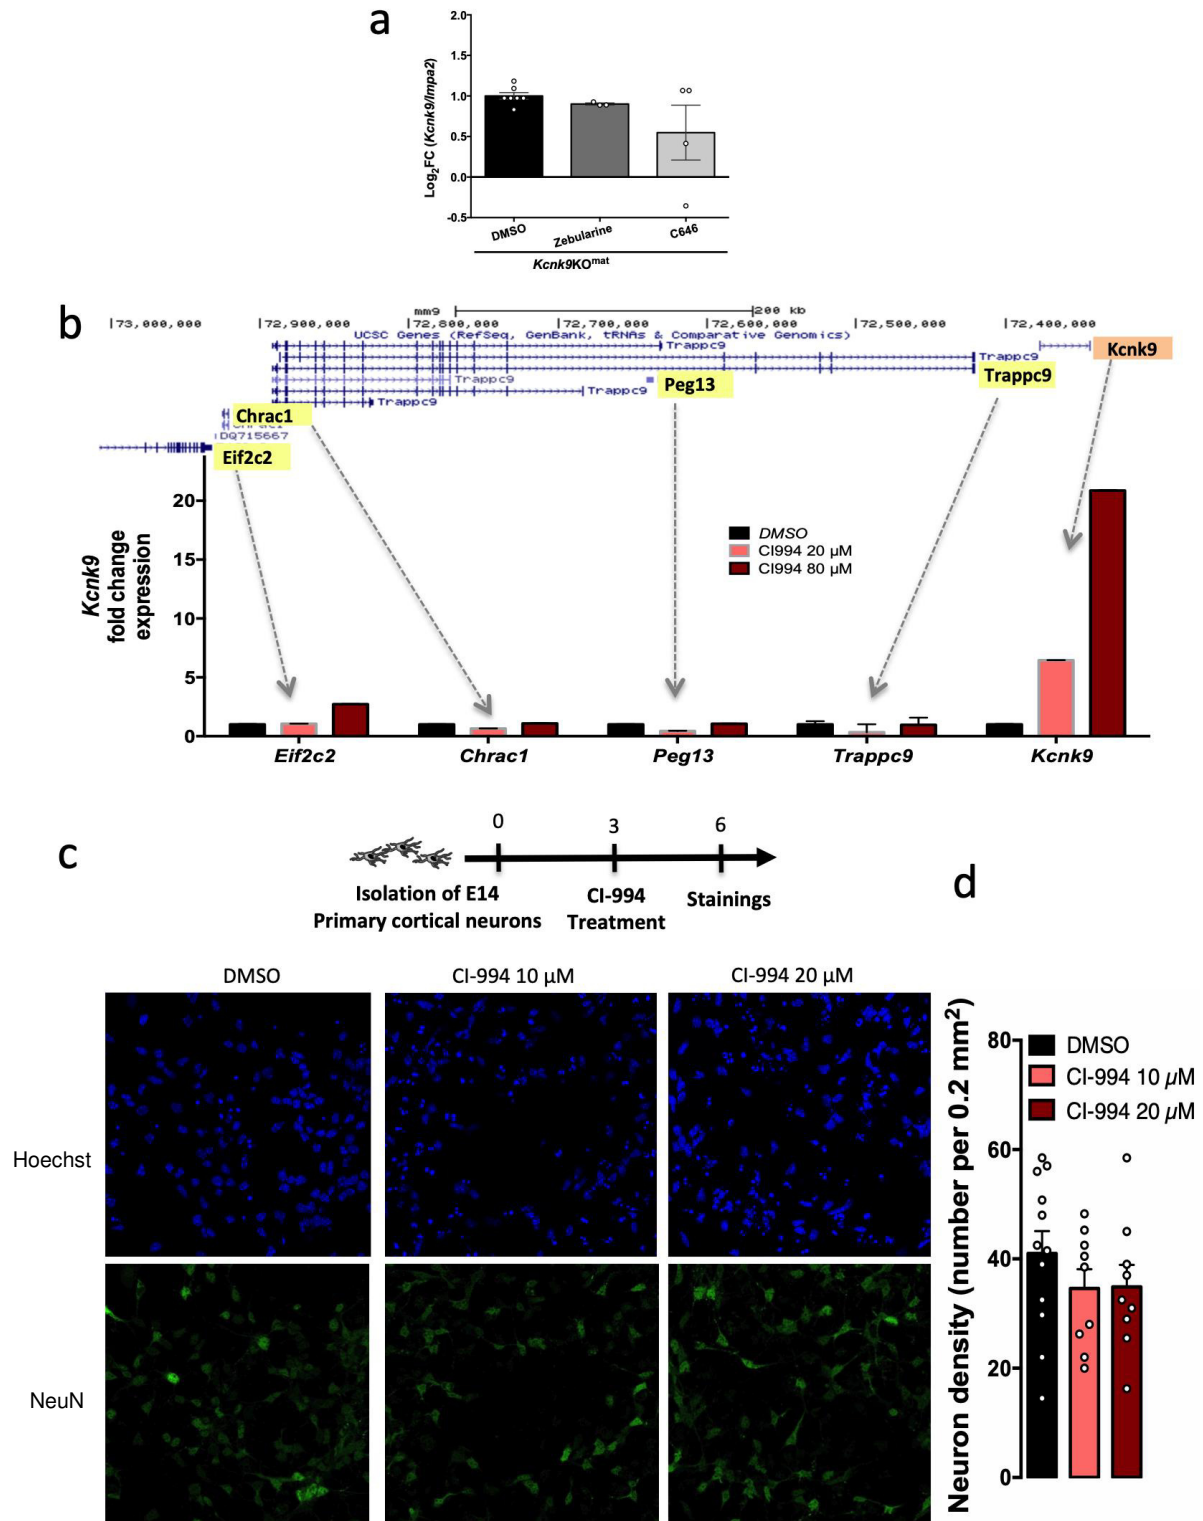

**Supplementary Figure 3: Epigenetic drug treatments in murine primary cortical neurons (mPCNs).** (a) The compounds Zebularine and C646 show no effect on the *Kcnk9* expression in *Kcnk9*KO<sup>mat</sup> mPCNs (Zebularine  $P=0.0667$ , C646  $P=0.4727$ , Mann-Whitney-U test). (b) RT-qPCR expression analysis of known genes in the imprinting cluster on mouse chromosome 15. CI-994 treatment (20  $\mu$ M and 80  $\mu$ M CI-994) did not affect expression of *Trappc9*, *Peg13*, *Chrac1* and *Eif2c2* in mPCNs ( $n=2-3$  cultures/group). (c) Evaluation of toxicity/viability in CI-994 treated mPCN compared to DMSO-treated controls. Cells were stained with Hoechst 33258 (nucleus) and NeuN (mature neurons) 3 days after treatment with either DMSO or CI-994. (d) Neuron density after CI-994 treatment. No significant difference in neuronal density was observed between DMSO ( $n=12$ ), 10  $\mu$ M CI-994 ( $n=9$ ) and 20  $\mu$ M CI-994 ( $n=9$ ) treated mPCNs. Values are means  $\pm$  SEM. Statistical analyses and approaches are provided in Supplementary Table 1. Source data are provided as a Source Data file.

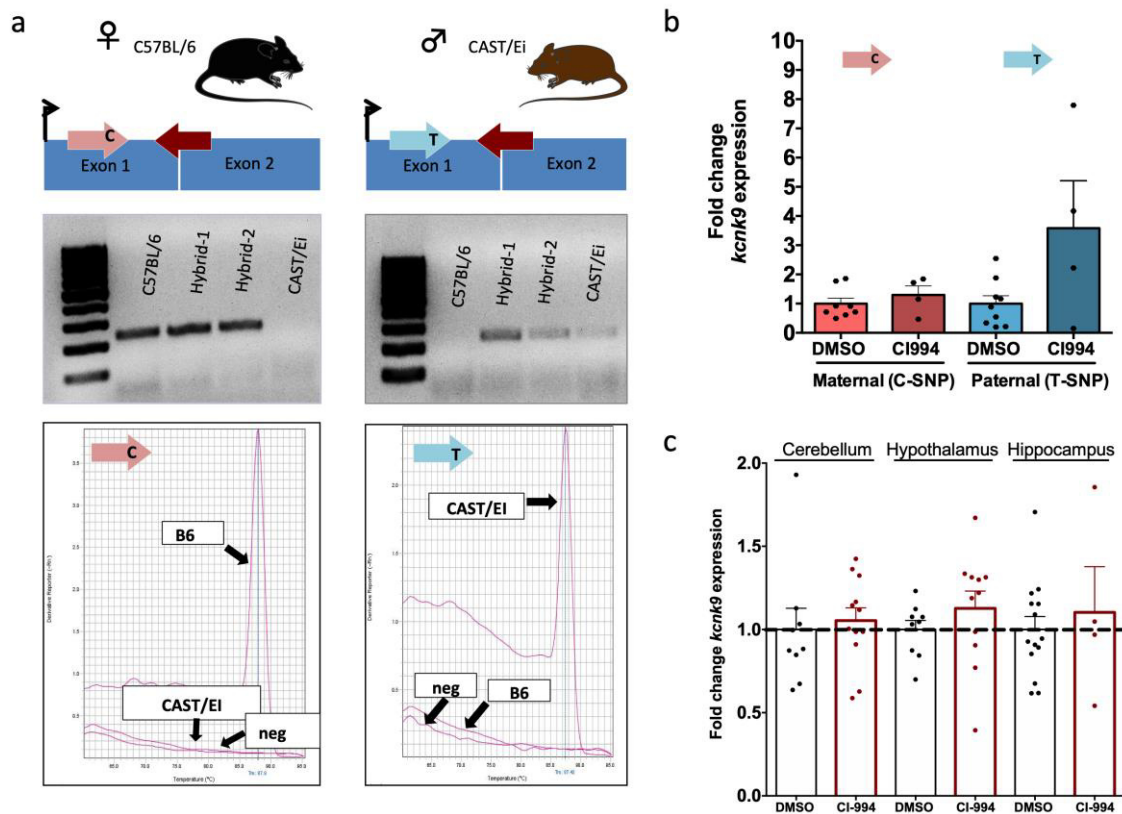

**Supplementary Figure 4: Allele-specific de-repression of *Kcnk9* in the mouse brain** (a) Assay design and melt curve analysis for the allele-specific RT-qPCR (AS-RT-qPCR) of *Kcnk9*. Allele-specific primers bind to the strain-specific SNP at the 3'-end, allowing only the complementary primer to elongate (top). Agarose gel electrophoresis of PCR product (231 bp) loaded on 2% agarose gel using a 100 bp DNA ladder (middle). Melt curve analysis shows a primer-specific binding (bottom). (b) Analysis of expression levels using the C57BL/6 C and Cast/Ei T allele-specific primer and normalization with a reference gene revealed an increased expression of the paternal *Kcnk9* allele in the hippocampus in *Kcnk9*KO<sup>mat</sup> hybrid mice treated with CI-994 (n= 4) compared to *Kcnk9*KO<sup>mat</sup> DMSO controls (n= 8). No difference between the maternal *Kcnk9* allele expression comparing DMSO (n= 9) and CI-994 (n=4) treated mice (c) Gene expression of *Kcnk9* in WT mice treated with DMSO compared to CI-994 treated mice shows no significant differences in several analysed brain regions. WT cerebellum (DMSO n= 9, CI-994 n=12), hypothalamus (DMSO n= 9, CI-994 n= 11) and hippocampus (DMSO n=14, CI-994 n=4). Mann-Whitney U, Values are means ± SEM. Statistical analyses and approaches are provided in Supplementary Table 1. Source data are provided as a Source Data file. Components of this figure were created using Servier Medical Art templates, which are licensed under a Creative Commons Attribution 3.0 Unported License; <https://smart.servier.com>.

a

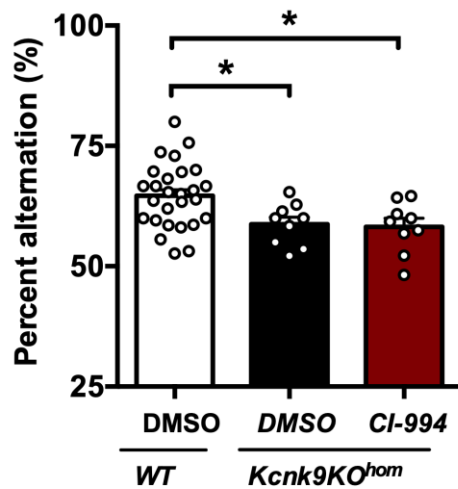

b

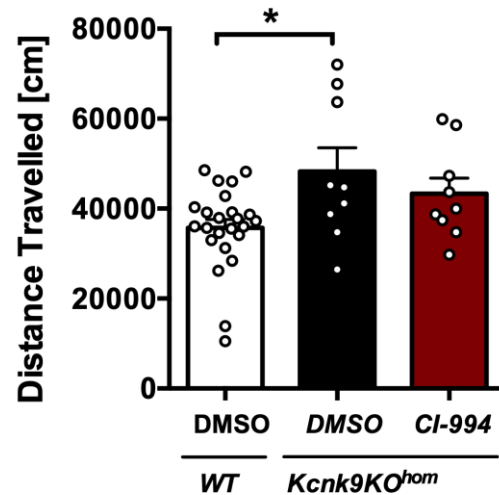

**Supplementary Figure 5: No behavioural rescue of *Kcnk9KO<sup>hom</sup>* mice after CI-994 treatment.** (a) Y-maze percentage alternation analysis of DMSO-treated WT (n=27), DMSO-treated *Kcnk9KO<sup>hom</sup>* (n=9) and CI994-treated *Kcnk9KO<sup>hom</sup>* (n=9) treated mice. DMSO- and CI-994-treated *Kcnk9KO<sup>hom</sup>* mice display a significant decrease in percentage alteration compared to WT mice. One-way ANOVA:  $F(2, 39) = 4.710$ ,  $P = 0.0147$ ; followed by Bonferroni's multiple comparison post hoc test,  $*P < 0.05$ . (b) Total locomotor activity in dark (12h) phase reveals no significant difference between DMSO-treated *Kcnk9KO<sup>hom</sup>* (n=9) and CI-994-treated *Kcnk9KO<sup>hom</sup>* (n=9) treated mice. A significant difference was observed by comparing DMSO-treated WT (n=24) and *Kcnk9KO<sup>hom</sup>* mice. One-way ANOVA:  $F(2, 42) = 5.569$ ,  $P = 0.0072$ ; followed by Bonferroni's multiple comparison post hoc test,  $*P < 0.05$ . (a-b) Behavioral data are from biologically independent animals (n= number of mice). Values are means  $\pm$  SEM. Statistical analyses and approaches are provided in Supplementary Table 1. Source data are provided as a Source Data file.

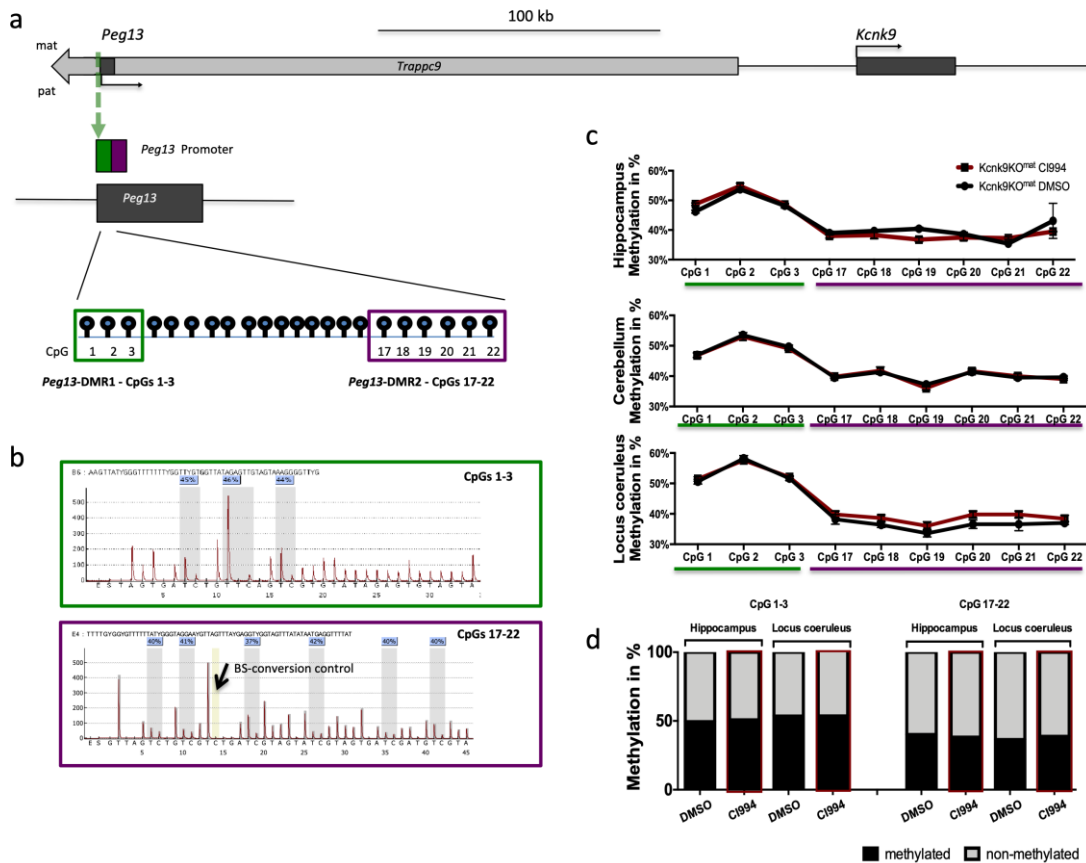

**Supplementary Figure 6: CI-994 treatment of *Kcnk9*KO<sup>mat</sup> mice does not interfere with DNA methylation at the *Peg13*-DMR.** (a) Schematic presentation of the *Kcnk9* and *Peg13* loci on distal mouse chromosome 15. The *Peg13* differentially methylated region (*Peg13*-DMR) is analyzed in two separate assays. *Peg13*-DMR1 (green) and *Peg13*-DMR2 (violet). Individual CpGs analysed are depicted as lollipops. (b) The pyrogram shows the methylation status of the *Peg13*-DMRs in the hippocampus. The Y-axis shows the intensity of the light emission. The X-axis shows the dispensing order of the added nucleotides. The CpGs are highlighted in gray. In the blue box, the percentage of methylation is given. The bisulfite conversion control is highlighted in yellow. (c,d) CI-994 did not significantly alter the DNA methylation status of *Peg13*-DMR1 (CpGs 1-3) and *Peg13*-DMR2 (CpGs 17-22) in hippocampus, cerebellum or locus coeruleus measured using the bisulfite pyrosequencing method, n=3-5 DNA samples/ group, biologically independent animals. Values are means  $\pm$  SEM. Statistical analyses and approaches are provided in Supplementary Table 1. Source data are provided as a Source Data file.



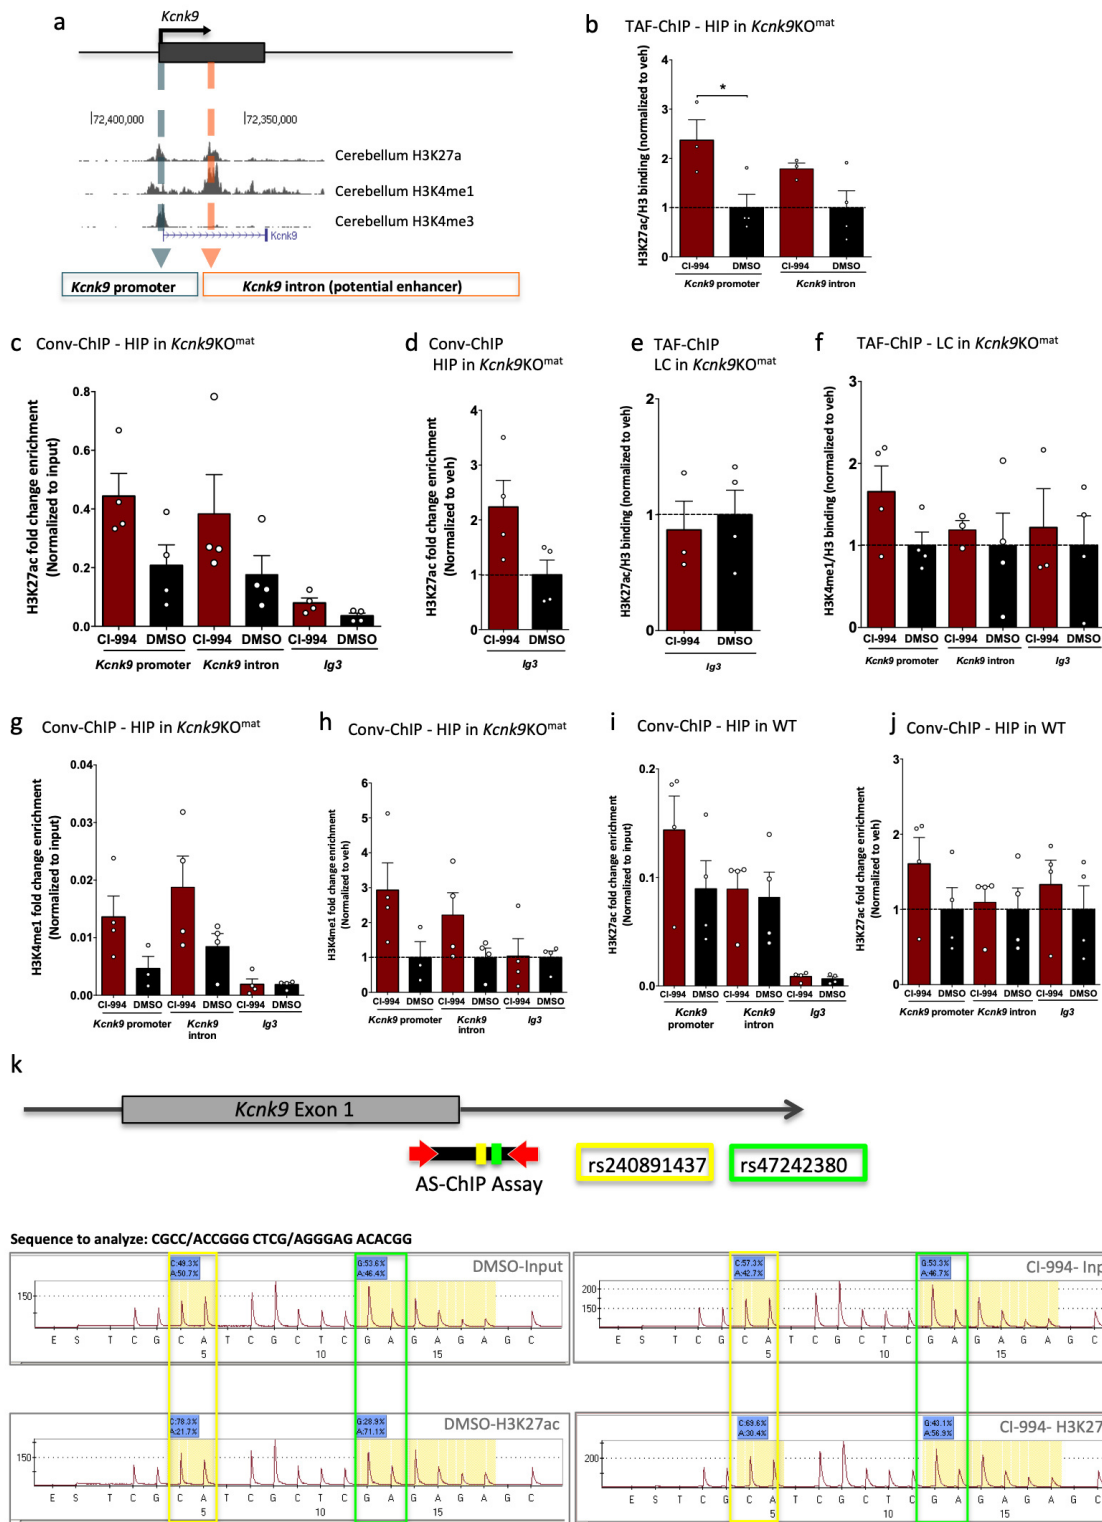

**Supplementary Figure 7: CI-994 treatment of *Kcnk9*<sup>KO<sup>mat</sup> mice affects histone modifications at the *Kcnk9* locus. (a) Schematic presentation of *Kcnk9* on distal mouse chromosome 15. The murine *Kcnk9* gene is shown with the corresponding H3K27ac, H3K4me1 and H3K4me3 peaks (UCSC Genome Browser on Mouse July 2007 (NCBI37/mm9) Assembly). (b) TAF-ChIP-qPCR of H3K27ac marks at the promoter and intronic region of *Kcnk9* in the hippocampus of *Kcnk9*<sup>KO<sup>mat</sup> animals following treatment with CI-994 (normalized to veh), *Kcnk9* promoter:  $P = 0.0342$ , and *Kcnk9* intron  $P = 0.1172$ , each DMSO vs. CI-994 (c) TAF-ChIP-qPCR of H3K27ac marks at the promoter and intronic region of *Kcnk9* in the hippocampus of *Kcnk9*<sup>KO<sup>mat</sup> animals following treatment with CI-994 (% of input). Related to figure 6b. (d) H3K27ac enrichment at intergenic control region in the hippocampus of *Kcnk9*<sup>KO<sup>mat</sup> animals following treatment with CI-994 (normalized to veh). Related to figure 6b and suppl. figure 8c. (e) H3K27ac enrichment (norm to H3) at intergenic control region in the locus coeruleus of *Kcnk9*<sup>KO<sup>mat</sup> animals following treatment with CI-994 (normalized to veh). Related to figure 6b. (f) TAF-ChIP-qPCR of H3K4me1 marks at the promoter and intronic region of *Kcnk9* in locus coeruleus of *Kcnk9*<sup>KO<sup>mat</sup> animals following</sup></sup></sup></sup></sup></sup>**

treatment with CI-994 (normalized to veh). **(g-h)** Conventional ChIP-qPCR of H3K4me1 marks at the promoter and intronic region of *Kcnk9* in the hippocampus of *Kcnk9*KO<sup>mat</sup> animals following treatment with CI-994 presented as (g) % of input and (h) normalized to veh. **(i-j)** Conventional ChIP-qPCR of H3K27ac marks at the promoter and intronic region of *Kcnk9* in the hippocampus of wildtype C57BL/6 animals following treatment with CI-994 presented as (i) % of input and (j) normalized to veh. **(b-j)** Values are means  $\pm$  SEM, Student's t-test; (n=3-4 animals/group). n= 3-4 samples/group, biologically independent animals. Data per plot was generated in 2 independent experiments. **(k)** Allele-specific ChIP-qPCR. The pyrogram shows the status of SNPS rs240891437 and rs47242380 in the intronic region of *Kcnk9* in the hippocampus. The Y-axis shows the intensity of the light emission. The X-axis shows the dispensing order of the added nucleotides. In the blue box, the percentage of the nucleotide arising from maternal and paternal allele is given. Statistical analyses and approaches are provided in Supplementary Table 1. Source data are provided as a Source Data file.



**Supplementary Table 1: Summary of statistical analyses and approaches**

| Subject                                           | Figure        | Genotype                                   | Mean ± SEM       | Factor          | n  | Statistics                                                                                   | Interaction | F value             | P value    | post hoc                               | adjusted p-values                                                                                 |
|---------------------------------------------------|---------------|--------------------------------------------|------------------|-----------------|----|----------------------------------------------------------------------------------------------|-------------|---------------------|------------|----------------------------------------|---------------------------------------------------------------------------------------------------|
| Y-maze alteration                                 | 1b            | WT                                         | 64.31 ± 1.619    |                 | 23 | one way ANOVA                                                                                |             | F (2, 91) = 7.261   | P = 0.0012 | Bonferroni's multiple comparisons test | **P<0.01 (WT vs. <i>Kcnk9KO<sup>mat</sup></i> )<br>*P<0.05 (WT vs. <i>Kcnk9KO<sup>hom</sup></i> ) |
|                                                   |               | <i>Kcnk9KO<sup>mat</sup></i>               | 56.62 ± 1.438    |                 | 27 |                                                                                              |             |                     |            |                                        |                                                                                                   |
|                                                   |               | <i>Kcnk9KO<sup>hom</sup></i>               | 59.02 ± 1.020    |                 | 44 |                                                                                              |             |                     |            |                                        |                                                                                                   |
| Circadian Rhythm                                  | 1c            | WT                                         | 22685 ± 2059     | Light phase     | 13 | one way ANOVA                                                                                |             | F (2, 29) = 2.281   | P = 0.1203 | Bonferroni's multiple comparisons test | n.s.                                                                                              |
|                                                   |               | <i>Kcnk9KO<sup>mat</sup></i>               | 29678 ± 3623     |                 | 10 |                                                                                              |             |                     |            |                                        |                                                                                                   |
|                                                   |               | <i>Kcnk9KO<sup>hom</sup></i>               | 30978 ± 3817     |                 | 9  |                                                                                              |             |                     |            |                                        |                                                                                                   |
|                                                   |               | WT                                         | 38741 ± 2384     | Dark phase      | 18 |                                                                                              |             |                     |            |                                        |                                                                                                   |
|                                                   |               | <i>Kcnk9KO<sup>mat</sup></i>               | 48170 ± 2457     |                 | 13 |                                                                                              |             |                     |            |                                        |                                                                                                   |
|                                                   |               | <i>Kcnk9KO<sup>hom</sup></i>               | 61800 ± 2627     |                 | 15 |                                                                                              |             |                     |            |                                        |                                                                                                   |
| QUASEP                                            | 1d            | Maternal expression of (C57BL/6xCast/EI)F1 | 96,12142 ± 0,171 | Cerebellum      | 14 |                                                                                              |             |                     |            |                                        |                                                                                                   |
|                                                   |               |                                            | 99,15 ± 0,298    | Pons            | 10 |                                                                                              |             |                     |            |                                        |                                                                                                   |
|                                                   |               |                                            | 96,225 ± 1,541   | Olfactory bulb  | 12 |                                                                                              |             |                     |            |                                        |                                                                                                   |
|                                                   |               |                                            | 93,22143 ± 0,334 | Cortex          | 14 |                                                                                              |             |                     |            |                                        |                                                                                                   |
|                                                   |               |                                            | 99,45715 ± 0,204 | Hippocampus     | 14 |                                                                                              |             |                     |            |                                        |                                                                                                   |
|                                                   |               |                                            | 98,43333 ± 0,358 | Hypothalamus    | 9  |                                                                                              |             |                     |            |                                        |                                                                                                   |
|                                                   |               |                                            | 95,28 ± 0,360    | Striatum        | 5  |                                                                                              |             |                     |            |                                        |                                                                                                   |
|                                                   |               |                                            | 99,06 ± 0,434    | Midbrain        | 5  |                                                                                              |             |                     |            |                                        |                                                                                                   |
|                                                   |               |                                            | 98,38 ± 0,450    | Medulla         | 5  |                                                                                              |             |                     |            |                                        |                                                                                                   |
|                                                   |               |                                            | 86,5 ± 1,843     | Locus coeruleus | 4  |                                                                                              |             |                     |            |                                        |                                                                                                   |
|                                                   |               | Paternal expression of (C57BL/6xCast/EI)F1 | 3,939 ± 0,154    | Cerebellum      | 14 |                                                                                              |             |                     |            |                                        |                                                                                                   |
|                                                   |               |                                            | 0,850 ± 0,298    | Pons            | 10 |                                                                                              |             |                     |            |                                        |                                                                                                   |
|                                                   |               |                                            | 3,775 ± 1,541    | Olfactory bulb  | 12 |                                                                                              |             |                     |            |                                        |                                                                                                   |
|                                                   |               |                                            | 6,750 ± 0,314    | Cortex          | 14 |                                                                                              |             |                     |            |                                        |                                                                                                   |
|                                                   |               |                                            | 0,543 ± 0,204    | Hippocampus     | 14 |                                                                                              |             |                     |            |                                        |                                                                                                   |
|                                                   |               |                                            | 1,567 ± 0,358    | Hypothalamus    | 9  |                                                                                              |             |                     |            |                                        |                                                                                                   |
|                                                   |               |                                            | 4,720 ± 0,360    | Striatum        | 5  |                                                                                              |             |                     |            |                                        |                                                                                                   |
|                                                   |               |                                            | 0,940 ± 0,434    | Midbrain        | 5  |                                                                                              |             |                     |            |                                        |                                                                                                   |
|                                                   |               |                                            | 1,620 ± 0,450    | Medulla         | 5  |                                                                                              |             |                     |            |                                        |                                                                                                   |
|                                                   |               |                                            | 13,500 ± 1,843   | Locus coeruleus | 4  |                                                                                              |             |                     |            |                                        |                                                                                                   |
| Open field (percent in center)                    | Suppl. 1a     | WT                                         | 14.00 ± 1.704    |                 | 12 | one way ANOVA                                                                                |             | F (2, 44) = 0.3167  | P = 0.7302 | Bonferroni's multiple comparisons test | n.s.                                                                                              |
|                                                   |               | <i>Kcnk9KO<sup>mat</sup></i>               | 17.97 ± 1.895    | 16              |    |                                                                                              |             |                     |            |                                        |                                                                                                   |
|                                                   |               | <i>Kcnk9KO<sup>hom</sup></i>               | 13.11 ± 1.361    | 19              |    |                                                                                              |             |                     |            |                                        |                                                                                                   |
| Elevated plus maze (duration in open arms)        | Suppl. 1b     | WT                                         | 14.00 ± 1.704    |                 | 22 | one way ANOVA                                                                                |             | F (2, 81) = 2.568   | P = 0.0829 | Bonferroni's multiple comparisons test | n.s.                                                                                              |
|                                                   |               | <i>Kcnk9KO<sup>mat</sup></i>               | 17.97 ± 1.895    | 27              |    |                                                                                              |             |                     |            |                                        |                                                                                                   |
|                                                   |               | <i>Kcnk9KO<sup>hom</sup></i>               | 13.11 ± 1.361    | 35              |    |                                                                                              |             |                     |            |                                        |                                                                                                   |
| Rotarod (latency to fall)                         | Suppl. 1c     | WT                                         | 240.5 ± 14.59    |                 | 15 | one way ANOVA                                                                                |             | F (2, 55) = 0.01168 | P = 0.9884 | Bonferroni's multiple comparisons test | n.s.                                                                                              |
|                                                   |               | <i>Kcnk9KO<sup>mat</sup></i>               | 237.6 ± 15.72    | 12              |    |                                                                                              |             |                     |            |                                        |                                                                                                   |
|                                                   |               | <i>Kcnk9KO<sup>hom</sup></i>               | 240.4 ± 10.49    | 31              |    |                                                                                              |             |                     |            |                                        |                                                                                                   |
| relative <i>Kcnk9</i> expression after knock-down | Fig. 2b       | shRNA 1                                    | 0,250            |                 | 1  | Arithmetic means of <i>Kcnk9</i> expression of presented IDs were provided by Sirion Biotech |             |                     |            |                                        |                                                                                                   |
|                                                   |               | shRNA 2                                    | 0,080            |                 | 1  |                                                                                              |             |                     |            |                                        |                                                                                                   |
|                                                   |               | shRNA 3                                    | 0,110            |                 | 1  |                                                                                              |             |                     |            |                                        |                                                                                                   |
|                                                   |               | shRNA 4                                    | 0,070            |                 | 1  |                                                                                              |             |                     |            |                                        |                                                                                                   |
|                                                   |               | shRNA 5                                    | 0,160            |                 | 1  |                                                                                              |             |                     |            |                                        |                                                                                                   |
|                                                   |               | shRNA 6                                    | 0,030            |                 | 1  |                                                                                              |             |                     |            |                                        |                                                                                                   |
|                                                   |               | shRNA 7                                    | 0,060            |                 | 1  |                                                                                              |             |                     |            |                                        |                                                                                                   |
|                                                   |               | shRNA 8                                    | 0,040            |                 | 1  |                                                                                              |             |                     |            |                                        |                                                                                                   |
|                                                   |               | shRNA 9                                    | 0,050            |                 | 1  |                                                                                              |             |                     |            |                                        |                                                                                                   |
|                                                   |               | shRNA 10                                   | 0,060            |                 | 1  |                                                                                              |             |                     |            |                                        |                                                                                                   |
|                                                   |               | neagitive control                          | 1,000            |                 | 1  |                                                                                              |             |                     |            |                                        |                                                                                                   |
| <i>Kcnk9</i> expression after knock-down          | Fig. 2c left  | WT scrambled control                       | 1.000 ± 0.05220  | PFC             | 8  | Mann-Whitney U (Two-tailed)                                                                  |             |                     |            |                                        |                                                                                                   |
|                                                   |               | WT <i>kcnk9</i> knock-down                 | 1.031 ± 0.04726  |                 | 4  |                                                                                              |             |                     |            |                                        |                                                                                                   |
|                                                   |               | WT scrambled control                       | 1.000 ± 0.08301  | Hippocampus     | 7  |                                                                                              |             |                     |            |                                        |                                                                                                   |
|                                                   |               | WT <i>kcnk9</i> knock-down                 | 0.9579 ± 0.06216 |                 | 4  |                                                                                              |             |                     |            |                                        |                                                                                                   |
|                                                   |               | WT scrambled control                       | 1.000 ± 0.1570   | Locus coeruleus | 7  |                                                                                              |             |                     |            |                                        |                                                                                                   |
|                                                   |               | WT <i>kcnk9</i> knock-down                 | 0.2067 ± 0.08371 |                 | 4  |                                                                                              |             |                     |            |                                        |                                                                                                   |
| Tyrosine hydroxylase expression                   | Fig. 2c right | WT scrambled control                       | 1.148 ± 0.1343   | Locus coeruleus | 7  | Mann-Whitney U (Two-tailed)                                                                  |             |                     |            |                                        | n.s.                                                                                              |
|                                                   |               | WT <i>kcnk9</i> knock-down                 | 1.000 ± 0.1703   |                 | 4  |                                                                                              |             |                     |            |                                        |                                                                                                   |

|                                             |           |                                                                                                                                          |                                                                                                                                                                                                                                                                                                                 |                                                                                                               |                                                                                                                                                                                      |                              |                                                                                                                                                                                                                                                                                                                                                                 |
|---------------------------------------------|-----------|------------------------------------------------------------------------------------------------------------------------------------------|-----------------------------------------------------------------------------------------------------------------------------------------------------------------------------------------------------------------------------------------------------------------------------------------------------------------|---------------------------------------------------------------------------------------------------------------|--------------------------------------------------------------------------------------------------------------------------------------------------------------------------------------|------------------------------|-----------------------------------------------------------------------------------------------------------------------------------------------------------------------------------------------------------------------------------------------------------------------------------------------------------------------------------------------------------------|
| Circadian Rhythm                            | Fig. 2d   | WT scrambled control<br>WT <i>kcnk9</i> knock-down                                                                                       | 78517 ± 5343<br>105984 ± 6699                                                                                                                                                                                                                                                                                   | Dark phase                                                                                                    | 9<br>10                                                                                                                                                                              | Mann-Whitney U (Two-tailed)  | P=0,0101                                                                                                                                                                                                                                                                                                                                                        |
| Y-maze alteration                           | Fig. 2e   | WT scrambled control<br>WT <i>kcnk9</i> knock-down                                                                                       | 60.44 ± 2.352<br>53.20 ± 4.002                                                                                                                                                                                                                                                                                  |                                                                                                               | 9<br>10                                                                                                                                                                              | Mann-Whitney U (Two-tailed)  | P=0,0797                                                                                                                                                                                                                                                                                                                                                        |
| Tyrosine hydroxylase expression             | Suppl. 2a | <i>Kcnk9KO<sup>mat</sup></i>                                                                                                             | 420,600 ± 24,150<br>6,562 ± 1,117<br>0,664 ± 0.1037                                                                                                                                                                                                                                                             | LC<br>Cerebellum<br>Hippocampus                                                                               | 6<br>5<br>5                                                                                                                                                                          | one way ANOVA                | Locus Coeruleus vs. Cerebellum ****P < 0.0001<br>Locus Coeruleus vs. Hippocampus ****P < 0.0001<br>Cerebellum vs. Hippocampus                                                                                                                                                                                                                                   |
| <i>Kcnk9</i> expression                     | Suppl. 2c | <i>Kcnk9KO<sup>mat</sup></i><br>WT                                                                                                       | 1,000 ± 0,637<br>5,914 ± 0,033                                                                                                                                                                                                                                                                                  | LC                                                                                                            | 3<br>3                                                                                                                                                                               | Mann-Whitney U (Two-tailed)  | P=0.1000                                                                                                                                                                                                                                                                                                                                                        |
| Mean frequency                              | 3d        | WT<br><i>Kcnk9KO<sup>mat</sup></i><br><i>Kcnk9KO<sup>hom</sup></i><br>WT<br><i>Kcnk9KO<sup>mat</sup></i><br><i>Kcnk9KO<sup>hom</sup></i> | 2,383 ± 0,153<br>2,593 ± 0,181<br>2,350 ± 0,258<br>3,265 ± 0,256<br>2,640 ± 0,284<br>3,799 ± 0,295                                                                                                                                                                                                              | day<br>day<br>day<br>night<br>night<br>night                                                                  | 46<br>41<br>22<br>23<br>26<br>30                                                                                                                                                     | 2-way ANOVA                  | Interaction F (2, 182) = 4.435 P = 0.0132 Bonferroni's multiple comparisons test Light Phase: <i>Kcnk9KO<sup>hom</sup></i> vs. Dark phase: <i>Kcnk9KO<sup>hom</sup></i> **P<0.01<br>Phase F (1, 182) = 16.93 P < 0.0001 Dark phase: <i>Kcnk9KO<sup>mat</sup></i> vs. Dark phase: <i>Kcnk9KO<sup>hom</sup></i> *P<0.05<br>Genotype F (2, 182) = 1.836 P = 0.1624 |
| Cortical neurons all drugs                  | 4c        | <i>Kcnk9KO<sup>mat</sup></i>                                                                                                             | 1.000 ± 0.0417<br>3.853 ± 0.3724<br>5.307 ± 0.6183<br>5.963 ± 0.1874<br>6.738 ± 0.2760                                                                                                                                                                                                                          | DMSO<br>VPA<br>DZnep<br>SAHA<br>CI-994                                                                        | 7<br>3<br>3<br>3<br>3                                                                                                                                                                | one way ANOVA                | vs. DMSO<br>F (4, 14) = 92.00 P < 0.0001 Bonferroni's multiple comparisons test ****P < 0.0001<br>****P < 0.0001<br>****P < 0.0001<br>****P < 0.0001                                                                                                                                                                                                            |
| Cortical neurons CI-994                     | 4d        | <i>Kcnk9KO<sup>mat</sup></i>                                                                                                             | 1.000 ± 0.0656<br>2.586 ± 0.3351<br>3.642 ± 0.2920<br>4.349 ± 0.1035<br>5.216 ± 0.2264<br>3.636 ± 0.2824                                                                                                                                                                                                        | DMSO<br>4 μM<br>20 μM<br>40 μM<br>80 μM<br>WT DMSO                                                            | 9<br>2<br>4<br>4<br>4<br>5                                                                                                                                                           | one way ANOVA                | vs. DMSO<br>F (5, 22) = 75.51 P < 0.0001 Bonferroni's multiple comparisons test ****P < 0.0001<br>****P < 0.0001<br>****P < 0.0001<br>****P < 0.0001                                                                                                                                                                                                            |
| Duration of unsilencing in cortical neurons | 4e        | <i>Kcnk9KO<sup>mat</sup></i>                                                                                                             | 1,000 ± 0,104<br>2,738 ± 0,339<br>1,000 ± 0,089<br>2,619 ± 0,265                                                                                                                                                                                                                                                | (3-5 wells/sample)<br>day 1 DMSO<br>day 1 CI-994<br>day 10 DMSO<br>day 10 CI-994                              | 2 samples<br>3 samples<br>6 samples<br>4 samples                                                                                                                                     | Unpaired t-test (Two-tailed) | 1 day<br>P=0,0297<br>10 days<br>P=0.0001                                                                                                                                                                                                                                                                                                                        |
| Cortical neurons drugs no effect            | Suppl. 3a | <i>Kcnk9KO<sup>mat</sup></i>                                                                                                             | 1.000 ± 0.0417<br>0.901 ± 0.013<br>0.548 ± 0.338                                                                                                                                                                                                                                                                | DMSO<br>Zebularine<br>C646                                                                                    | 7<br>3<br>4                                                                                                                                                                          | Mann-Whitney U (Two-tailed)  | vs. DMSO<br>P=0.0667<br>P=0.4727                                                                                                                                                                                                                                                                                                                                |
| RT-qPCR analysis of cluster genes           | Suppl. 3b | <i>Kcnk9KO<sup>mat</sup></i>                                                                                                             | <i>Ej2c2</i> 1,050 ± 0,014<br><i>Chrac1</i> 0,646 ± 0,014<br><i>Peg13</i> 0,442 ± 0,018<br><i>Trappe9</i> 0,337 ± 0,678<br><i>Kcnk9</i> 6,448 ± 0,016<br><i>Ej2c2</i> 2,718 ± 0,024<br><i>Chrac1</i> 1,084 ± 0,024<br><i>Peg13</i> 1,060 ± 0,024<br><i>Trappe9</i> 0,965 ± 0,608<br><i>Kcnk9</i> 20,870 ± 0,042 | Cultures<br>CI-994 20 μM<br>CI-994 80 μM                                                                      | 2<br>3<br>3<br>3<br>2<br>3<br>2<br>3<br>3<br>2                                                                                                                                       | Mann-Whitney U               |                                                                                                                                                                                                                                                                                                                                                                 |
| Neuron density after CI-994 treatment       | Suppl. 3d | <i>Kcnk9KO<sup>mat</sup></i>                                                                                                             | 41,000 ± 4,082<br>34,580 ± 3,530<br>34,860 ± 4,035                                                                                                                                                                                                                                                              | DMSO<br>CI-994 10 μM<br>CI-994 20 μM                                                                          | 12<br>9<br>9                                                                                                                                                                         | one way ANOVA                | F (2, 27) = 0.8983 P = 0.4191                                                                                                                                                                                                                                                                                                                                   |
| RT-qPCR expression in several brain regions | 5b        | <i>Kcnk9KO<sup>mat</sup></i>                                                                                                             | 2.89 ± 0.20<br>1.18 ± 0.21<br>2.65 ± 0.55<br>2.22 ± 0.55<br>2.77 ± 0.41<br>2.01 ± 1.07<br>0.96 ± 0.19<br>2.08 ± 0.28                                                                                                                                                                                            | Cerebellum<br>Cortex<br>Hippocampus<br>Pons<br>Hypothalamus<br>Medulla<br>Prefrontal cortex<br>Olfactory bulb | DMSO: 12<br>CI-994: 13<br>DMSO: 6<br>CI-994: 9<br>DMSO: 12<br>CI-994: 14<br>DMSO: 7<br>CI-994: 8<br>DMSO: 9<br>CI-994: 12<br>DMSO: 6<br>CI-994: 6<br>DMSO: 9<br>CI-994: 9<br>DMSO: 6 | Mann-Whitney U (Two-tailed)  | P < 0.0001<br>P= 0,3251<br>P= 0.0003<br>P= 0,0002<br>P= 0,0003<br>P= 0,3961<br>P= 0,7319<br>P= 0.0022                                                                                                                                                                                                                                                           |

|                                                |           |                                                            |                      |                                    |                      |                               |                   |                      |                                                            |                                                                                                                                                                     |            |
|------------------------------------------------|-----------|------------------------------------------------------------|----------------------|------------------------------------|----------------------|-------------------------------|-------------------|----------------------|------------------------------------------------------------|---------------------------------------------------------------------------------------------------------------------------------------------------------------------|------------|
|                                                |           |                                                            |                      | CI-994: 6                          |                      |                               |                   |                      |                                                            |                                                                                                                                                                     |            |
|                                                |           |                                                            | 2,90 ± 0,92          | Locus coeruleus                    | DMSO: 7<br>CI-994: 8 |                               |                   |                      | P=0,0401                                                   |                                                                                                                                                                     |            |
|                                                |           |                                                            | 2,25 ± 0,69          | Caudal Pontine Reticular Formation | DMSO: 7<br>CI-994: 4 |                               |                   |                      | P=0,1409                                                   |                                                                                                                                                                     |            |
| Cerebellum after CI-994 treatment              | Sc        | WT                                                         | 5.337 ± 0.165        | DMSO                               | 9                    | 2-way-ANOVA                   | Interaction       | F (1, 42) = 26.16    | P < 0.0001                                                 | Bonferroni's multiple comparisons test<br>****P<0.0001 (all comparisons except DMSO: WT vs CI-994: WT)                                                              |            |
|                                                |           |                                                            | 5.445 ± 0.123        | CI-994                             | 12                   |                               | Treatment         | F (1, 42) = 34.92    | P < 0.0001                                                 |                                                                                                                                                                     |            |
|                                                |           | <i>Kcnk9</i> KO <sup>mat</sup>                             | 1.000 ± 0.125        | DMSO                               | 12                   |                               | Genotype          | F (1, 42) = 719.1    | P < 0.0001                                                 |                                                                                                                                                                     |            |
|                                                |           |                                                            | 2.497 ± 0.133        | CI-994                             | 13                   |                               |                   |                      |                                                            |                                                                                                                                                                     |            |
| RT-qPCR analysis of cluster genes              | Sd        | Hippocampus                                                |                      |                                    |                      | Mann-Whitney U                |                   |                      |                                                            |                                                                                                                                                                     |            |
|                                                |           | <i>Kcnk9</i> KO <sup>mat</sup>                             |                      |                                    |                      |                               |                   |                      |                                                            |                                                                                                                                                                     |            |
|                                                |           | <i>Eif2c2</i>                                              | 1,000 ± 0,016        |                                    | 5                    |                               |                   |                      |                                                            | Kcnk9 CI-994 vs. DMSO:<br>P=0.0079                                                                                                                                  |            |
|                                                |           | <i>Chrac1</i>                                              | 1,000 ± 0,044        |                                    | 5                    |                               |                   |                      |                                                            |                                                                                                                                                                     |            |
|                                                |           | <i>Peg13</i>                                               | 1,000 ± 0,032        | DMSO                               | 5                    |                               |                   |                      |                                                            |                                                                                                                                                                     |            |
|                                                |           | <i>Trappc9</i>                                             | 1,000 ± 0,054        |                                    | 5                    |                               |                   |                      |                                                            |                                                                                                                                                                     |            |
|                                                |           | <i>Kcnk9</i>                                               | 1,000 ± 0,091        |                                    | 5                    |                               |                   |                      |                                                            |                                                                                                                                                                     |            |
|                                                |           | <i>Eif2c2</i>                                              | 1,000 ± 0,156        |                                    | 5                    |                               |                   |                      |                                                            |                                                                                                                                                                     |            |
|                                                |           | <i>Chrac1</i>                                              | 0,982 ± 0,088        |                                    | 5                    |                               |                   |                      |                                                            |                                                                                                                                                                     |            |
|                                                |           | <i>Peg13</i>                                               | 0,986 ± 0,105        | CI994 (30mg/kg)                    | 5                    |                               |                   |                      |                                                            |                                                                                                                                                                     |            |
|                                                |           | <i>Trappc9</i>                                             | 1,210 ± 0,188        |                                    | 5                    |                               |                   |                      |                                                            |                                                                                                                                                                     |            |
|                                                |           | <i>Kcnk9</i>                                               | 2,313 ± 0,423        |                                    | 5                    |                               |                   |                      |                                                            |                                                                                                                                                                     |            |
| Ymaze alteration after CI-994 treatment        | Se        | WT                                                         | 64.62772 ± 1.290     | DMSO                               | 20                   | 2-way-ANOVA                   | Interaction       | F (1, 96) = 3.700    | P = 0.0574                                                 | **P<0.01 (WT:DMSO vs. <i>Kcnk9</i> KO <sup>mat</sup> :DMSO)                                                                                                         |            |
|                                                |           |                                                            | 64.77955 ± 1.614     | CI-994                             | 18                   |                               | Treatment         | F (1, 96) = 4.096    | P = 0.0458                                                 | **P<0.01 (WT:CI-994 vs. <i>Kcnk9</i> KOmat :DMSO)                                                                                                                   |            |
|                                                |           | <i>Kcnk9</i> KO <sup>mat</sup>                             | 57.179977 ± 1.584    | DMSO                               | 21                   |                               | Genotype          | F (1, 96) = 8.992    | P = 0.0035                                                 | *P<0.05 (Kcnk9KOmat: CI-994 vs. Kcnk9KOmat :DMSO)                                                                                                                   |            |
|                                                |           |                                                            | 63.15288 ± 1.493     | CI-994                             | 24                   |                               |                   |                      |                                                            |                                                                                                                                                                     |            |
| Circadian Rhythm light phase CI-994            | Sf        | WT                                                         | 17562,000 ± 999,600  | DMSO                               | 20                   | 2-way-ANOVA                   | Interaction       | F (1, 43) = 0.5104   | P = 0.0018                                                 | Bonferroni's multiple comparisons test<br>n.s.                                                                                                                      |            |
|                                                |           |                                                            | 16754,000 ± 1061,000 | CI-994                             | 10                   |                               | Treatment         | F (1, 43) = 0.006126 | P = 0.0366                                                 |                                                                                                                                                                     |            |
|                                                |           | <i>Kcnk9</i> KO <sup>mat</sup>                             | 15950,000 ± 1073,000 | DMSO                               | 8                    |                               | Genotype          | F (1, 43) = 0.3064   | P = 0.1763                                                 |                                                                                                                                                                     |            |
|                                                |           |                                                            | 16958,000 ± 1557,000 | CI-994                             | 9                    |                               |                   |                      |                                                            |                                                                                                                                                                     |            |
| Circadian Rhythm dark phase CI-994             | Sf        | WT                                                         | 35719,000 ± 1874,000 | DMSO                               | 24                   | 2-way-ANOVA                   | Interaction       | F (1, 60) = 10.68    | P = 0.0031                                                 | **P<0.01 (WT:DMSO vs. <i>Kcnk9</i> KO <sup>mat</sup> :DMSO)                                                                                                         |            |
|                                                |           |                                                            | 38601,000 ± 2630,000 | CI-994                             | 15                   |                               | Treatment         | F (1, 60) = 4.571    | P = 0.0518                                                 | Bonferroni's multiple comparisons test                                                                                                                              |            |
|                                                |           | <i>Kcnk9</i> KO <sup>mat</sup>                             | 47535,000 ± 3016,000 | DMSO                               | 12                   |                               | Genotype          | F (1, 60) = 1.872    | P = 0.1960                                                 |                                                                                                                                                                     |            |
|                                                |           |                                                            | 33758,000 ± 2785,000 | CI-994                             | 13                   |                               |                   |                      | **P<0.01 (Kcnk9KOmat: CI-994 vs. <i>Kcnk9</i> KOmat :DMSO) |                                                                                                                                                                     |            |
| Allele-specific expression of <i>Kcnk9</i>     | Suppl. 4b |                                                            | 1,000 ± 0,185        | maternal DMSO                      | 8                    | Mann-Whitney U                |                   |                      |                                                            | P=0,6828                                                                                                                                                            |            |
|                                                |           | WT hippocampus                                             | 1,296 ± 0,314        | maternal CI-994                    | 4                    |                               |                   |                      |                                                            |                                                                                                                                                                     |            |
|                                                |           |                                                            | 1,000 ± 0,268        | paternal DMSO                      | 9                    |                               |                   |                      |                                                            |                                                                                                                                                                     | P=0,2601   |
|                                                |           |                                                            | 3,583 ± 1,626        | paternal CI-994                    | 4                    |                               |                   |                      |                                                            |                                                                                                                                                                     |            |
| <i>Kcnk9</i> expression after CI-994 treatment | Suppl. 4c | WT cerebellum                                              | 1,000 ± 0,128        | DMSO                               | 9                    | Mann-Whitney U                |                   |                      |                                                            | P=0,3368                                                                                                                                                            |            |
|                                                |           |                                                            | 1,054 ± 0,076        | CI-994                             | 12                   |                               |                   |                      |                                                            |                                                                                                                                                                     |            |
|                                                |           | WT hypothalamus                                            | 1,000 ± 0,054        | DMSO                               | 9                    |                               |                   |                      |                                                            |                                                                                                                                                                     | P=0,1726   |
|                                                |           |                                                            | 1,127 ± 0,104        | CI-994                             | 11                   |                               |                   |                      |                                                            |                                                                                                                                                                     |            |
|                                                |           | 1,000 ± 0,078                                              | DMSO                 | 14                                 |                      |                               |                   | P=0,8778             |                                                            |                                                                                                                                                                     |            |
|                                                |           | 1,103 ± 0,274                                              | CI-994               | 4                                  |                      |                               |                   |                      |                                                            |                                                                                                                                                                     |            |
| Y-maze alteration                              | Suppl. 5a | WT                                                         | 64,630 ± 1,291       | DMSO                               | 27                   | one way ANOVA                 |                   |                      |                                                            | Bonferroni's multiple comparisons test<br>*P<0.05 (WT DMSO vs. <i>Kcnk9</i> KO <sup>mat</sup> :DMSO)                                                                |            |
|                                                |           | <i>Kcnk9</i> KO <sup>hom</sup>                             | 58,740 ± 1,465       | DMSO                               | 9                    |                               | F (2, 39) = 4.710 | P = 0.0147           |                                                            |                                                                                                                                                                     |            |
|                                                |           | <i>Kcnk9</i> KO <sup>hom</sup>                             | 58,200 ± 1,775       | CI-994                             | 9                    |                               |                   |                      |                                                            |                                                                                                                                                                     |            |
| Circadian Rhythm                               | Suppl. 5b | WT                                                         | 35719,000 ± 1874,000 | DMSO                               | 24                   | one way ANOVA                 |                   |                      |                                                            | Bonferroni's multiple comparisons test<br>*P<0.05 (WT DMSO vs. <i>Kcnk9</i> KO <sup>mat</sup> :DMSO)<br>*P<0.05 (WT DMSO vs. <i>Kcnk9</i> KO <sup>mat</sup> CI-994) |            |
|                                                |           | <i>Kcnk9</i> KO <sup>hom</sup>                             | 48275,000 ± 5271,000 | DMSO                               | 9                    |                               | F (2, 42) = 5.569 | P = 0.0072           |                                                            |                                                                                                                                                                     |            |
|                                                |           | <i>Kcnk9</i> KO <sup>hom</sup>                             | 43338,000 ± 3433,000 | CI-994                             | 9                    |                               |                   |                      |                                                            |                                                                                                                                                                     |            |
| Conventional CHIP H3K27ac                      | 6b        |                                                            | 1,000 ± 0,147        | <i>kcnk9</i> prom                  | DMSO: 9              | Student's t-test (Two-tailed) |                   |                      |                                                            | P = 0.0001                                                                                                                                                          |            |
|                                                |           | H3K27ac fold enrichment in hippocampus (Normalized to Veh) | 2,137 ± 0,1687       |                                    | CI-994: 9            |                               |                   |                      |                                                            |                                                                                                                                                                     |            |
|                                                |           |                                                            | 1,000 ± 0,232        | <i>kcnk9</i> intron                | DMSO: 8              |                               |                   |                      |                                                            |                                                                                                                                                                     | P = 0.0270 |
|                                                |           |                                                            | 2,097 ± 0,3791       |                                    | CI-994: 8            |                               |                   |                      |                                                            |                                                                                                                                                                     |            |
| Low-input CHIP H3K27ac                         |           |                                                            | 1.000 ± 0.1245       | <i>kcnk9</i> prom                  | DMSO: 4              |                               |                   |                      |                                                            | P = 0.0450                                                                                                                                                          |            |
|                                                |           | H3K27ac/H3 binding in LC (Fold Change to Veh)              | 2.288 ± 0.4945       |                                    | CI-994: 4            |                               |                   |                      |                                                            |                                                                                                                                                                     |            |
|                                                |           |                                                            | 1.000 ± 0.2305       | <i>kcnk9</i> intron                | DMSO: 4              |                               |                   |                      |                                                            |                                                                                                                                                                     | P = 0.0202 |
|                                                |           | 2.414 ± 0.3838                                             |                      | CI-994: 3                          |                      |                               |                   |                      |                                                            |                                                                                                                                                                     |            |
|                                                |           |                                                            | 72,990               | WT DMSO=3                          |                      |                               |                   |                      |                                                            | P = 0,2                                                                                                                                                             |            |
|                                                |           |                                                            | 63,942               | WT CI-994=4                        |                      |                               |                   |                      |                                                            |                                                                                                                                                                     |            |

|                                 |             |                                                                                                                                   |                    |                                                      |                                                      |                                                 |          |
|---------------------------------|-------------|-----------------------------------------------------------------------------------------------------------------------------------|--------------------|------------------------------------------------------|------------------------------------------------------|-------------------------------------------------|----------|
| Allele-specific<br>ChIP         | 6c          | Maternal H3K27ac<br>enrichment in the<br>hippocampus<br>(C57BL/6xCast/EI)F1                                                       | 68,505             | rs 240891437                                         | <i>Kcnk9</i> <sup>KO<sup>mt</sup></sup><br>:DMSO=6   | Student's t-<br>test (Two-<br>tailed)           | P=0.4476 |
|                                 |             |                                                                                                                                   | 61,894             |                                                      | <i>Kcnk9</i> <sup>KO<sup>mt</sup></sup><br>:CI-994=4 |                                                 |          |
|                                 |             |                                                                                                                                   | 61,180             |                                                      | WT DMSO=3                                            |                                                 | P=0.0571 |
|                                 |             |                                                                                                                                   | 51,170             |                                                      | WT CI-994=4                                          |                                                 |          |
|                                 |             |                                                                                                                                   | 57,820             | rs 47242380                                          | <i>Kcnk9</i> <sup>KO<sup>mt</sup></sup><br>:DMSO=6   |                                                 | P=0.0476 |
|                                 |             | 51,360                                                                                                                            |                    | <i>Kcnk9</i> <sup>KO<sup>mt</sup></sup><br>:CI-994=4 |                                                      |                                                 |          |
|                                 |             | Paternal H3K27ac<br>enrichment in the<br>hippocampus<br>(C57BL/6xCast/EI)F1                                                       | 27,010             |                                                      | WT DMSO=3                                            | P=0.2                                           |          |
|                                 |             |                                                                                                                                   | 36,058             |                                                      | WT CI-994=4                                          |                                                 |          |
|                                 |             |                                                                                                                                   | 31,495             | rs 240891437                                         | <i>Kcnk9</i> <sup>KO<sup>mt</sup></sup><br>:DMSO=6   | P=0.4476                                        |          |
|                                 |             |                                                                                                                                   | 38,106             |                                                      | <i>Kcnk9</i> <sup>KO<sup>mt</sup></sup><br>:CI-994=4 |                                                 |          |
| 38,800                          |             |                                                                                                                                   | WT DMSO=3          | P=0.0571                                             |                                                      |                                                 |          |
| 48,830                          |             | WT CI-994=4                                                                                                                       |                    |                                                      |                                                      |                                                 |          |
| 42,183                          | rs 47242380 | <i>Kcnk9</i> <sup>KO<sup>mt</sup></sup><br>:DMSO=6                                                                                | P=0.0476           |                                                      |                                                      |                                                 |          |
| 48,640                          |             | <i>Kcnk9</i> <sup>KO<sup>mt</sup></sup><br>:CI-994=4                                                                              |                    |                                                      |                                                      |                                                 |          |
| Methylation<br>of Peg13-<br>DMR | Suppl. 6    | Hippocampus                                                                                                                       | 49,37 ± 0,65       |                                                      | DMSO: 3                                              | RM 2-way-<br>ANOVA<br>treated vs<br>non-treated | P=0.1348 |
|                                 |             |                                                                                                                                   | 50,71 ± 0,59       | CpGs 1-3                                             | CI-994: 3                                            |                                                 |          |
|                                 |             |                                                                                                                                   | 39,36 ± 1,34       |                                                      | DMSO: 3                                              |                                                 | P=0.2744 |
|                                 |             |                                                                                                                                   | 37,87 ± 2,67       | CpGs 17-22                                           | CI-994: 3                                            |                                                 |          |
|                                 |             | Cerebellum                                                                                                                        | 50,05 ± 0,71       |                                                      | DMSO: 4                                              |                                                 | P=0.6190 |
|                                 |             |                                                                                                                                   | 49,61 ± 0,51       | CpGs 1-3                                             | CI-994: 3                                            |                                                 |          |
|                                 |             |                                                                                                                                   | 39,77 ± 0,36       |                                                      | DMSO: 4                                              |                                                 | P=0.9366 |
|                                 |             |                                                                                                                                   | 39,72 ± 0,70       | CpGs 17-22                                           | CI-994: 3                                            |                                                 |          |
|                                 |             | LC                                                                                                                                | 53,47 ± 0,81       |                                                      | DMSO: 5                                              |                                                 | P=0.7135 |
|                                 |             |                                                                                                                                   | 53,72 ± 0,62       | CpGs 1-3                                             | CI-994: 5                                            |                                                 |          |
|                                 |             |                                                                                                                                   | 36,40 ± 1,30       |                                                      | DMSO: 5                                              |                                                 | P=0.1840 |
|                                 |             |                                                                                                                                   | 38,73 ± 1,18       | CpGs 17-22                                           | CI-994: 5                                            |                                                 |          |
| TAF-ChIP<br>H3K27ac             | Suppl. 7b   | <i>H3K27ac/H3 binding</i><br>(normalized to veh)<br>in hippocampus of<br><i>Kcnk9</i> <sup>KO<sup>mt</sup></sup>                  | 1.000 ± 0.2726     | <i>kcnk9</i> prom                                    | DMSO: 4                                              | Student's t-<br>test                            | P=0.0342 |
|                                 |             |                                                                                                                                   | 2.369 ± 0.4146     |                                                      | CI-994: 3                                            |                                                 |          |
|                                 |             |                                                                                                                                   | 1.000 ± 0.3419     | <i>kcnk9</i> intron                                  | DMSO: 4                                              |                                                 | P=0.1172 |
|                                 |             |                                                                                                                                   | 1.787 ± 0.1179     |                                                      | CI-994: 3                                            |                                                 |          |
| Convent. ChIP<br>H3K27ac        | Suppl. 7c   | <i>H3K27ac fold change</i><br>enrichment<br>(Normalized to input)<br>in hippocampus of<br><i>Kcnk9</i> <sup>KO<sup>mt</sup></sup> | 0,4436 ± 0,07741   | <i>kcnk9</i> prom                                    | CI-994: 4                                            | Student's t-<br>test (Two-<br>tailed)           | P=0,0648 |
|                                 |             |                                                                                                                                   | 0,2074 ± 0,07044   |                                                      | DMSO: 4                                              |                                                 |          |
|                                 |             |                                                                                                                                   | 0,3834 ± 0,1338    | <i>kcnk9</i> intron                                  | CI-994: 4                                            |                                                 | P=0.2130 |
|                                 |             |                                                                                                                                   | 0,176 ± 0,0652     |                                                      | DMSO: 4                                              |                                                 |          |
|                                 |             |                                                                                                                                   | 0,0796 ± 0,01726   | <i>Ig3</i>                                           | CI-994: 4                                            |                                                 | P=0.0671 |
|                                 |             |                                                                                                                                   | 0,03558 ± 0,009545 |                                                      | DMSO: 4                                              |                                                 |          |
| Convent. ChIP<br>H3K27ac        | Suppl. 7d   | <i>H3K27ac fold change</i><br>enrichment<br>(normalized to veh)<br>in hippocampus                                                 | 2,237 ± 0,485      |                                                      | CI-994: 4                                            | Student's t-<br>test (Two-<br>tailed)           | P=0,0671 |
|                                 |             |                                                                                                                                   | 1,000 ± 0,268      | <i>Ig3</i>                                           | DMSO: 4                                              |                                                 |          |
| TAF-ChIP<br>H3K27ac             | Suppl. 7e   | <i>H3K27ac/H3 binding</i><br>(normalized to veh)<br>in LC                                                                         | 0,869              | 0,248                                                | CI-994: 3                                            | Student's t-<br>test (Two-<br>tailed)           | P=0,7046 |
|                                 |             |                                                                                                                                   | 1,000              | 0,212                                                | <i>Ig3</i>                                           |                                                 | DMSO: 4  |
| Low-input<br>ChIP<br>H3K4me1    | Suppl. 7f   | <i>H3K4me1/H3</i><br>binding (normalized<br>to veh)<br>in LC of <i>Kcnk9</i> <sup>KO<sup>mt</sup></sup>                           | 1,656 ± 0,313      | <i>kcnk9</i> prom                                    | CI-994: 4                                            | Student's t-<br>test (Two-<br>tailed)           | P=0.1118 |
|                                 |             |                                                                                                                                   | 1,000 ± 0,162      |                                                      | DMSO: 4                                              |                                                 |          |
|                                 |             |                                                                                                                                   | 1,188 ± 0,116      | <i>kcnk9</i> intron                                  | CI-994: 3                                            |                                                 | P=0.7092 |
|                                 |             |                                                                                                                                   | 1 ± 0,3949         |                                                      | DMSO: 4                                              |                                                 |          |
|                                 |             |                                                                                                                                   | 1,219 ± 0,473      |                                                      | CI-994: 3                                            |                                                 | P=0.7226 |
| 1 ± 0,3612                      | <i>Ig3</i>  | DMSO: 4                                                                                                                           |                    |                                                      |                                                      |                                                 |          |
| Convent. ChIP<br>H3K4me1        | Suppl. 7g   | <i>H3K4me1 fold change</i><br>enrichment<br>(Normalized to input)<br>in <i>Kcnk9</i> <sup>KO<sup>mt</sup></sup><br>hippocampus    | 0,014 ± 0,004      | <i>kcnk9</i> prom                                    | CI-994: 4                                            | Student's t-<br>test (Two-<br>tailed)           | P=0.1115 |
|                                 |             |                                                                                                                                   | 0,005 ± 0,002      |                                                      | DMSO: 3                                              |                                                 |          |
|                                 |             |                                                                                                                                   | 0,019 ± 0,005      | <i>kcnk9</i> intron                                  | CI-994: 4                                            |                                                 | P=0,1299 |
|                                 |             |                                                                                                                                   | 0,00846 ± 0,002263 |                                                      | DMSO: 4                                              |                                                 |          |
|                                 |             |                                                                                                                                   | 0,002 ± 0,001      | <i>Ig3</i>                                           | CI-994: 4                                            |                                                 | P=0.9485 |
| 0,001843 ± 0,0003437            |             | DMSO: 4                                                                                                                           |                    |                                                      |                                                      |                                                 |          |
| Convent. ChIP<br>H3K4me1        | Suppl. 7h   | <i>H3K4me1 fold change</i><br>enrichment<br>(Normalized to veh)<br>in hippocampus of<br><i>Kcnk9</i> <sup>KO<sup>mt</sup></sup>   | 2,930 ± 0,782      | <i>kcnk9</i> prom                                    | CI-994: 4                                            | Student's t-<br>test (Two-<br>tailed)           | P=0.1115 |
|                                 |             |                                                                                                                                   | 1,000 ± 0,453      |                                                      | DMSO: 3                                              |                                                 |          |
|                                 |             |                                                                                                                                   | 2,217 ± 0,640      | <i>kcnk9</i> intron                                  | CI-994: 4                                            |                                                 | P=0,1299 |
|                                 |             |                                                                                                                                   | 1 ± 0,2676         |                                                      | DMSO: 4                                              |                                                 |          |
|                                 |             |                                                                                                                                   | 1,036 ± 0,504      | <i>Ig3</i>                                           | CI-994: 4                                            |                                                 | P=0.9485 |
| 1 ± 0,1865                      |             | DMSO: 4                                                                                                                           |                    |                                                      |                                                      |                                                 |          |
| Convent. ChIP<br>H3K27ac        | Suppl. 7i   | <i>H3K27ac fold change</i><br>enrichment<br>(Normalized to input)<br>in hippocampus of<br>WT                                      | 0,144 ± 0,031      | <i>kcnk9</i> prom                                    | CI-994: 4                                            | Student's t-<br>test (Two-<br>tailed)           | P=0.2312 |
|                                 |             |                                                                                                                                   | 0,089 ± 0,026      |                                                      | DMSO: 4                                              |                                                 |          |
|                                 |             |                                                                                                                                   | 0,089 ± 0,017      | <i>kcnk9</i> intron                                  | CI-994: 4                                            |                                                 | P=0.7998 |
|                                 |             |                                                                                                                                   | 0,0816 ± 0,02327   |                                                      | DMSO: 4                                              |                                                 |          |
| 0,009 ± 0,002                   | <i>Ig3</i>  | CI-994: 4                                                                                                                         | P=0.4922           |                                                      |                                                      |                                                 |          |

|                          |           |                     |          |        |                     |           |                                       |           |
|--------------------------|-----------|---------------------|----------|--------|---------------------|-----------|---------------------------------------|-----------|
|                          |           | 0.006498 ±          | 0.002042 | -      | DMSO: 4             |           |                                       |           |
| Convent. ChIP<br>H3K27ac | Suppl. 7) | H3K27ac fold change | 1,606 ±  | 0,351  | <i>kcnk9</i> prom   | CI-994: 4 | Student's t-<br>test (Two-<br>tailed) | P =0,2312 |
|                          |           | enrichment          | 1,000 ±  | 0,290  |                     | DMSO: 4   |                                       |           |
|                          |           | (Normalized to veh) | 1,094 ±  | 0,210  | <i>kcnk9</i> intron | CI-994: 4 |                                       |           |
|                          |           | in hippocampus of   | 1 ±      | 0,2851 |                     | DMSO: 4   |                                       |           |
|                          |           | WT                  | 1,331 ±  | 0,325  | Ig3                 | CI-994: 4 |                                       |           |
|                          |           | 1 ±                 | 0,3143   |        | DMSO: 4             |           | P = 0.7092                            |           |

Abbreviations: n, number of samples/mice; n.s., not significant

Supplementary Table 2: Primers used for PCR and pyrosequencing analyses

| Primer           |     |                         | Sequence (5' – 3')             |
|------------------|-----|-------------------------|--------------------------------|
| TASK3-P3         | F   | Genotyping              | TGCGAGCTTCAGAGAGGATG           |
| TASK3-P4         | R   | Genotyping              | ATGCTCTAATCTCCAGTCTG           |
| Kcnk9 Exon2      | F   | Genotyping              | CACCACGCCATGTACTTCCT           |
| Kcnk9 Exon2      | R   | Genotyping              | GGACCGGAAGTAGGTGTTC            |
| Kcnk9-SNP        | F   | Allele-specific RT-qPCR | CACAACATATCGGATATGGACATGC      |
| Kcnk9-SNP        | R   | Allele-specific RT-qPCR | TGCCGCGGTGTTTCGAT              |
| Kcnk477          | F   | QUASEP                  | GCCTGTACCTTCACCTAC             |
| Kcnk477          | R   | QUASEP                  | CACAACATATCGGATATGGACATGC      |
| Kcnk477_S        | Seq | QUASEP                  | TGCCGCGGTGTTTC                 |
| kcnk9-283/284    | F   | RT-qPCR                 | ACTATCGGATATGGACATGCTGC        |
| kcnk9-283/284    | R   | RT-qPCR                 | GCCCAGGCTCTGGAACATAA           |
| Bdnf             | F   | RT-qPCR                 | ATCCACTGAGCAAAGCCGAA           |
| Bdnf             | R   | RT-qPCR                 | CCTGGTGGAACATTGTGGCT           |
| Impa2            | F   | RT-qPCR                 | CGTGCGGGACAAATCATCAG           |
| Impa2            | R   | RT-qPCR                 | AAGGAAACCGCTTTTCGCAAC          |
| Kcnk9 promoter   | F   | ChIP-qPCR               | CGTGTGCGCTACATCTCCTA           |
| Kcnk9 promoter   | R   | ChIP-qPCR               | ATTTCGCCGTTTCTCTACT            |
| Kcnk9 intron     | F   | ChIP-qPCR               | AGGGCAGATGCTTAAGAGGA           |
| Kcnk9 intron     | R   | ChIP-qPCR               | CATCTGTTCTGTACCCCATCC          |
| mPeg13-CpG 1-9   | F   | Methylation analysis    | TTGGATGAGTTATTATATAAAGGTTTAAAA |
| mPeg13-CpG 1-9   | R   | Methylation analysis    | ACAACACTACCTACATTCCAATCT       |
| mPeg13-CpG_1-9   | Seq | Methylation analysis    | AAATTTTAATAAGATGGGTTAAT        |
| mPeg13-CpG 17-22 | F   | Methylation analysis    | AGATTTGGAATGTAGGTAGTTGTGA      |
| mPeg13-CpG 17-22 | R   | Methylation analysis    | CCTCAATAAAACCATTCTAATCAACTAT   |
| mPeg13-CpG 17-22 | Seq | Methylation analysis    | GGTAATTTGTTAGGTGGAGATATA       |
| Ago2_F           | F   | Cluster gene analysis   | CGACAACATCACCCATCCCA           |
| Ago2_R           | R   | Cluster gene analysis   | TTTGATTGTTCTCCCGGTGGT          |
| Chrac1_F         | F   | Cluster gene analysis   | AAGAGCTCTCCGAGGTGTC            |
| Chrac1-R         | R   | Cluster gene analysis   | TACTGAACAAAGAGCTCCGTGGC        |
| Peg13_F          | F   | Cluster gene analysis   | AAGATCCGCGGCCCTTACTC           |
| Peg13_R          | R   | Cluster gene analysis   | TTTTGCCCATTCCTCGGTCA           |
| Trappc9_F        | F   | Cluster gene analysis   | TGGGGCTGAAAAGACACTACAA         |
| Trappc9_R        | R   | Cluster gene analysis   | TGGTAGTGTACCAGGGCGT            |
| Kcnk9-SNP_EP-C_F | F   | AS-RT-qPCR              | TGCCGCGGTGTTTCGAC              |
| Kcnk9-SNP_EP-R   | R   | AS-RT-qPCR              | GCATGTCCATATCCGATAGTTGTG       |
| Kcnk9-SNP_EP-T_F | F   | AS-RT-qPCR              | TGCCGCGGTGTTTCGAT              |
| KCNK9-AS-ChIP-F  | F   | AS-CHIP                 | AAATTCGCCGTTTCTCTAC            |
| KCNK9-AS-ChIP-R  | R   | AS-CHIP                 | gagatgtagcgcacacgaagc          |
| KCNK9-AS-ChIP-S  | Seq | AS-CHIP                 | aaggaatgggtgtgc                |

Abbreviations: F, forward primer; R, reverse primer; Seq, pyrosequencing primer

## **Supplementary References**

1. Paxinos, G. & Franklin, K. B. J. *The Mouse Brain in Stereotaxic Coordinates* (Academic Press, 2008).
