# Supplementary material for: Inhibition of histone deacetylation rescues phenotype in a mouse model of Birk-Barel intellectual disability syndrome
Source: Nat Commun. 2020 Jan 24;11:480. doi: 10.1038/s41467-019-13918-4 (PMC6981138; doi:10.1038/s41467-019-13918-4)
Supplement: Supplementary file 3 — Source Data [file 41467_2019_13918_MOESM3_ESM.xlsx]

## Sheet: Fig. 1
Fig. 1b				Fig 1c							Fig. 1d
Y-Maze				Distance Travelled [cm]							QUASEP
Percent alternation (%)				Day Phase			Dark Phase				Cerebellum	Pons	Olfactory bulb	Cortex	Hippocampus	Hypothalamus	Striatum	Midbrain	Medulla	Locus coeruleus
WT	Kcnk9KOmat	Kcnk9KOhom		WT	Kcnk9KOmat	Kcnk9KOhom	WT	Kcnk9KOmat	Kcnk9KOhom		maternal expression in %
66.0377	53.3333	54.8387		22005	25554.6	20045	39115.5	39956	42359.9		96	98.4	97.9	94.7	98.4	98.7	95.6	98.9	97.8	88.5
67.3469	58.8235	51.6129		35388.2	34768.1	20745.2	41031.6	39325.1	54963.9		96.2	97.6	96.8	93.8	100	100	95.3	97.7	98.1	87.8
78.9474	67.3913	54.8387		37933.2	19342	24932	36834.6	37446.2	52879.3		96.3	100	97.6	94.9	100	100	96.2	100	97.4	81
71.1539	62.963	65.2174		22646.5	24034.4	51587.3	35927.2	45464.4	64760		96.4	100	98.5	93.1	100	97.5	95.3	98.7	100	88.7
74.0741	68.75	55.3571		20027.2	42066	46901.8	60898.6	60257.2	69260.5		96.4	98.6	98.2	93.4	98.7	97.8	94	100	98.6
75	63.2911	50.7463		28296.8	54266.6	35392.4	64021.6	49805	49170.6		96.5	100	97.2	93.5	100	97.6
63.4615	55.102	76.087		19709.8	33026	29496	44380.4	58562.1	67291		95.4	100	97.6	94.1	100	98.9
65.1163	57.1429	68.6274		15284	19989	22301.8	35143.7	48748.7	71608.3		97	100	97.4	93.1	100	98.4
60.5263	66.6667	66.1017		25041	24577.2	27398.1	38560.5	63199.7	63022.2		96	98.2	100	93.4	98.6	97
59.0909	64.9123	64.8649		17006	19154.4		40610.3	41754.3	75233.6		97.1	98.7	96.8	93.7	98.2
50	50	47.4576		21260.9			37383.8	56936.9	65812.7		94.8		79.5	91.4	100
66.6667	56.6667	66.1017		12749.9			30556.8	40721.7	75040.5		96		97.2	93.1	98.5
63.6364	46.8085	51.6129		17560.7			35252.9	44032.1	50167.1		95.2			92.9	100
51.282	58.8235	57.1429					39993.6		56216.9		96.4			90, 4	100
67.1642	54.717	60.4167					37859.5		69219.2
62.963	62.963	55.4054					29618				Cerebellum	Pons	Olfactory bulb	Cortex	Hippocampus	Hypothalamus	Striatum	Midbrain	Medulla	Locus coeruleus
52.6316	61.5385	58.3333					26350.4				paternal expression in %
67.8571	42.8571	56.8627					23797.7				4	1.6	2.1	5.3	1.6	1.3	4.4	1.1	2.2	11.5
58.8235	63.8298	73.5294									3.8	2.4	3.2	6.2	0	0	4.7	2.3	1.9	12.2
71.7949	53.0612	60.3448									3.7	0	2.4	5.1	0	0	3.8	0	2.6	19
54.7619	59.6491	57.5									3.6	0	1.5	6.9	0	2.5	4.7	1.3	0	11.3
58.9744	44.1861	64.8148									3.6	1.4	1.8	6.6	1.3	2.2	6	0	1.4
71.7391	44	61.4035									3.5	0	2.8	6.5	0	2.4
	54.3478	48.8372									4.6	0	2.4	5.9	0	1.1
	58.0645	60									3	0	2.6	6.9	0	1.6
	46.875	60									4	1.8	0	6.6	1.4	3
	51.8518	58									2.9	1.3	3.2	6.3	1.8
		60.5263									5.2		20.5	8.6	0
		69.7674									4		2.8	6.9	1.5
		57.1429									4.8			7.1	0
		61.5385									3.6			9.6	0
		65.8537
		60.4651
		50
		56.5217
		47.8261
		70.7317
		55.8139
		52.9412
		50
		58
		63.3333
		51.9231
		54.5455

## Sheet: Fig. 2
Fig 2b
ID	Ct Target	Ct Ref	ΔCp	ΔΔCp	Target expression relative to control	21mer sequence	position on mRNA	Region		Fig. 2c left
1	13.03	18.79	-5.76	2.02	0.25	GCGCGAGGAGGAGAAACTTAA	1525	ORF		PFC		Hippocampus		Locus coeruleus
2	13.3	17.42	-4.12	3.65	0.08	CGCGAGGAGGAGAAACTTAAA	1526	ORF		scrambled control	Kcnk9 knock down	scrambled control	Kcnk9 knock down	scrambled control	Kcnk9 knock down
3	13.56	18.13	-4.57	3.21	0.11	TCAGAGGCAAGTACAACATCA	1563	ORF		0.799754	1.00132	1.0058	0.777342	0.709769	0.446886
4	13.89	17.86	-3.97	3.81	0.07	GGAAATTCGCCGGTTCCTTCT	1653	ORF		0.884482	0.927479	1.06574	1.01241	0.737845	0.104833
5	12.86	18.01	-5.15	2.63	0.16	TTTCTATGGAGAACATGGTGA	1881	ORF		1.09593	1.15401	1.08155	0.983123	1.57865	0.0806993
6	14.54	17.34	-2.79	4.98	0.03	AGTGTGAAGATTGGAGCTTCT	1959	ORF		1.01965	1.03937	1.27597	1.05869	0.835943	0.194314
7	14.87	18.58	-3.71	4.07	0.06	CCTACTACTACTGCTTCATAA	1986	ORF		0.955002		0.714797		1.42462
8	14.72	18	-3.28	4.5	0.04	TCTATGTGGCCTTCAGCTTCA	2076	ORF		0.876398		0.692952		1.24337
9	14.72	18.19	-3.47	4.31	0.05	TGGCCTTCAGCTTCATGTATA	2082	ORF		1.13816		1.16318		0.469811
10	14.11	17.91	-3.8	3.97	0.06	AGATTCTTGCTGGAAATCCAA	2205	ORF		1.23062
NT	11.11	18.88	-7.78	0	1
						Fig. 2c right				Fig. 2d			Fig. 2e
						Fold change expression (Tyrosine hydroxylase/I mpa2)				Distance Travelled [cm]			Percent alternation (%)
						scrambled control	Kcnk9 knock down			scrambled control	Kcnk9 knock down		scrambled control	Kcnk9 knock down
						1.13912	1.20953			72679.3	134647		68	36
						0.935097	1.33941			66837.5	103624		68	56
						1.55614	0.5871			63306.5	103414		48	60
						0.647467	0.863955			83092.6	95926.1		52	60
						1.65946				103377	102132		56	48
						1.12884				62381.9	75879		64	52
						0.966411				69855.9	86164.9		64	36
										104491	140585		60	52
										80628.1	91739.5		64	52
											125733			80

## Sheet: Fig. 3
Fig. 3d
mean frequency (Hz)
WT-day	matKO-day	KO-day	WT-night	matKO-night	KO-night
3.8	6.2	3	2.3	1.1	5.2
3.2	3.4	5.6	1	2.6	2.6
3.5	4.4	1.7	4.2	1.4	1.6
3.5	4.9	2.1	2.5	2.7	3
4	3.7	2.3	2.2	3.1	1.8
2.4	3.8	2	4.6	3	3.4
3.5	2.6	2	3.3	0.6	5.6
5	2.3	2.1	2.4	1.5	4.5
2.6	1.4	0.6	3.2	3.2	2.2
1.6	1.3	1.4	1.1	4.8	5
1.8	2.1	1.4	2.4	2.1	6.2
1.4	2	2.7	2.3	3.4	7.7
0.9	2.2	2.5	4.8	6	5.2
2.5	2.6	3.1	4	5	3.5
3.2	1.7	1.6	5.9	5	5.9
2.4	3.5	1.7	4.5	1.8	3
1.4	2.6	4.8	3.7	3	3.7
1.9	2.2	3.6	2.6	4.6	1.9
2.1	2	0.6	2.2	2.1	3
1.7	1.2	2.5	3.7	2.1	4.3
3.8	2.1	1.3	4.5	2.59	4.6
1.3	1.4	3.1	4.1	1.54	5.5
0.7	3.2		3.6	0.87	2.6
1.7	2.5			1.33	3.2
0.9	1.9			0.89	4.04
3.2	1.7			2.31	6.11
1.4	1				1.55
0.8	5.1				2.52
3.3	1.9				2.53
3.3	1.8				2.02
2	1.2
2.4	2.1
2.9	2.8
2.1	2.1
2	2.5
1.2	4
2	2.9
0.8	2.2
3.3	3.4
2.7	1.3
1.8	3.1
4.2
3.2
1.3
3
1.9

## Sheet: Fig. 4
Fig,. 4c
Log2FC (Kcnk9/Impa2) in primary cortical neurons
DMSO		VPA		DZnep		SAHA		CI994
1.09178	0.0289268	3.13702	0.0560548	5.82971	0.0249104	5.58934	0.0385741	7.28296	0.0119122
0.973278	0.00517341	4.03368	0.0519804	6.0155	0.0625142	6.12597	0.0133108	6.54149	0.0215633
0.973278	0.0246	4.38848	0.0639764	4.0748	0.0387267	6.17389	0.0520788	6.38947	0.0191701
0.973278	0.0196193
0.973278	0.0480861
1.1829	0.0104399
0.832211	0.023155
Fig. 4d													Fig.4e
Log2FC (Kcnk9/Impa2) in primary cortical neurons													Fold change Kcnk9 expression after CI-994 treatment in PCNs
DMSO		DMSO		4 µM		20 µM		40 µM		80 µM			day 1	day 10	day 1	day 10
mean	SD	mean	SD	mean	SD	mean	SD	mean	SD	mean	SD		1.10347	0.780717	2.07325	2.43974
3.06153	0.0845506	0.987036	0.0854329	2.25074	0.0467076	2.99122	0.010616	4.32361	0.0376748	4.55066	0.0465205		0.896528	1.41341	3.18456	2.39739
3.18426	0.0229841	0.987036	0.0252136	2.9209	0.0605047	3.35746	0.0248014	4.48507	0.00880758	5.56643	0.0482184			0.932523	2.95587	3.4042
3.3757	0.0426759	0.987036	0.109362			4.31068	0.0525094	4.51983	0.0281935	5.39139	0.0421139			0.997761		2.23621
3.99386	0.0661285	0.987036	0.0268695			3.91014	0.0976796	4.06598	0.0205529	5.35385	0.0482184			0.887162
4.56616	0.0833228	0.987036	0.0480861											0.988432
		0.987036	0.103245
		1.34065	0.002687
		0.586958	0.031616
		1.15018	0.025215

## Sheet: Fig. 5
Fig. 5b															Fig .5c
Kcnk9 expression after CI-994 treatment normalized to DMSO treatment												Log2FC expression (Kcnk9/Impa2)
Cerebellum	Cortex	Hippocampus	Pons	Hypothalamus	Medulla	Prefrontal Cortex	Olfactory Bulb	Locus Coeruleus	Caudal Pontine Reticular Formation			WT				Kcnk9KOmat
2.89672	1.26942	1.35663	1.99197	2.89	1.03766	0.898169	2.36638	0.858283	1.28417			DMSO		CI994		DMSO		CI994
2.342	0.771546	1.02574	3.82824	3.93	0.849905	0.590512	1.80167	1.11579	0.939172			5.227	0.0362704	4.60706	0.0514222	1.48689	0.00406102	2.67016	0.0380966
2.2214	1.48833	2.06947	1.50275	2.99	4.15235	1.15393		0.940455	3.89503			5.59868	0.00619533	5.42251	0.0370369	1.40614	0.04747	2.34706	0.0179394
2.53391		9.12638	1.57221	2.27		1.51383		1.68525	2.90029			6.41506	0.00383403	5.27361	0.137533	1.48266	0.0135027	2.2667	0.0675126
2.99218		1.77281		0.91		0.485221		2.6332				5.41048	0.0375695	4.70756	0.00384441	0.739102	0.0539236	2.46677	0.0371073
3.01686				2.16				2.09661				5.21094	0.0421612	5.39521	0.0323792	1.1832	0.0245383	2.71944	0.0282177
3.82558				2.05				5.90483				4.8147	0.0131793	5.5859	0.0379577	0.65184	0.0544903	2.73193	0.0179718
1.57022				1.55				7.93041				5.1639	0.0153449	5.62178	0.0343084	0.209484	0.0269708	3.09291	0.0316331
1.48266				5.5								5.46509	0.0313564	5.95394	0.0322726	0.471728	0.099572	1.73939	0.0341527
1.88803				1.83737								4.72912	0.0504436	5.64991	0.0502419	1.10561	0.0432348	1.65218	0.0289753
3.52097				2.06621										5.88625	0.0373805	1.25948	0.0171334	2.01955	0.108958
2.84454				5.0971										5.39583	0.0537457	0.678301	0.0505268	2.9668	0.0560329
3.97258														5.84291	0.0252642	1.32556	0.0332103	2.64253	0.00601051
3.68056																		3.15022	0.0289464
2.92746
4.03386
												Fig. 5e					Fig. 5f
Fig. 5d												Y-Maze - Percent alternation (%)					Distance Travelled [cm]
Clustergenes: Kcnk9 fold change expression after CI-9994 treatment												WT		Kcnk9KOmat			WT				Kcnk9KOmat
	DMSO					CI994 (30mg/kg)						DMSO	CI-994	DMSO	CI-994		Light phase	Dark phase	Light phase	Dark phase	Light phase	Dark phase	Light phase	Dark phase
Eif2c2	0.991394	1.00861	1.02726	1.03032	0.942418	0.448812	0.870554	1.13374	1.27767	1.26669		62	62.1622	61.5385	65.8537		15719.9	37267	19135.8	44347.4	13181.2	34647.8	19241.3	40273.3
Chrac1	1.04176	0.958238	0.945582	1.15273	0.901685	0.859774	0.878508	0.783677	1.19985	1.1887		68.1818	72.7273	70.3704	68.0851		12903.5	28413.3	20293.4	44145.7	12652.2	54813.6	15408.7	49537.5
Peg13	1.00238	0.997621	0.920748	1.1159	0.963349	0.739438	0.82913	0.884834	1.23677	1.23823		73.6842	67.7419	57.4468	62.2951		12544.2	26182.8	15496.4	44288.5	20993	36768.4	19864.2	38822.2
Trappc9	0.985674	1.01433	0.873291	1.19266	0.934046	1.91443	0.986283	1.26174	1.03992	0.849932		60	81.8182	71.7949	68.421		11866.5	34567.7	19812.7	52730.2	14794.1	56402.3	11350	21328.7
Kcnk9	0.867842	1.13216	1.13604	0.706306	1.15765	3.69236	1.15769	2.51452	1.77459	2.42686		53.125	62.069	47.7273	57.7778		11002	39095.6	12643.3	44047	16175.4	58296	14768.5	44605.4
												65.7895	56.7568	57.5	75		19651	42792.5	11090.5	29096.1	15509.5	50411.7	26130.2	39710.8
												80	63.2653	57.8947	58.0645		13006.5	39180.6	19734.2	20648.5	19984.1	25075	19700.4	27046.1
												65.3846	69.2308	60	65.8537		19024.1	36003.2	13820.9	38002.8	14313.8	49644.7	13527	47557.2
												69.5652	77.2727	58.3333	73.3333		17480	46068.5	16393	26468.6		47322	12632.5	27764.4
												72.973	76.3158	62.7451	57.1429		15257	48176.4	19116	34561.7		59681.2		25387.3
												52.6316	57.5758	68.75	63.2653		13746.5	36037.6		39920.9		50035.2		23134.3
												66.6667	57.7778	48.5714	59.375		22292.4	48531.4		32934.1		47325		31056.9
												69.697	71.4286	57.6923	62.5		15982.3	46189.3		27337.9				22635.9
												65	59.4595	49.1525	62.8571		19760.1	40321.4		57956.3
												75.6757	60	53.1915	57.5343		23329.9	37749.7		42524.8
												63.8889	77.7778	45.946	52.7273		17050.3	31239.2
												55.5556	67.5676	54.8387	58		18848.6	34154
												58.0645	50	48.7805	56.4103		22198.7	13890.9
												66.6667	64.2857	60	60.4651		21972.2	10511.8
												63.4146	66.6667	55.1724	59.375		27610.2	35735
												63.6364	69.0476	53.3333	83.871			38683
												60	58.9744		64			35545
												59.5238	51.1628		53.1915			37940
												58.5366	52.3809		70.2703			32991
												66.6667	62.8571
												70	66.6667
												58.6207	76
													54.8387

## Sheet: Fig. 6
	Fig. 6b
	H3K27ac fold enrichment in hippocampus (Normalized to Veh)				H3K27ac/H3 binding in LC (Fold Change to Veh)
	Kcnk9 promoter		Kcnk9 intron		Kcnk9 promoter		Kcnk9 intron
	DMSO	CI-994	DMSO	CI-994	DMSO	CI-994	DMSO	CI-994
	0.774057	2.09208	0.385347	1.74069	0.838984	3.5	1.60293	3.12167
	0.980672	2.57113	1.38612	1.32854	0.736175	2.34	0.680352	2.31684
	1.11403	2.05484	0.481776	2.33962	1.22262	2.23	0.601513	1.80294
	1.28384	2.231	1.74676	2.6555	1.20222	1.08	1.1152
	0.8474	1.72351	2.08221	4.44877
	1.87969	3.2224	0.796839	1.49962
	1.17147	2.04198	0.715508	1.2269
	0.593981	1.6867	0.40544	1.53693
	0.35486	1.60587
	Suppl. Fig. 7h
	Allele-specific ChIP - rs 240891437
	Maternal H3K27ac enrichment in the hippocampus (C57BL/6xCast/Ei)F1				Paternal H3K27ac enrichment in the hippocampus (C57BL/6xCast/Ei)F1				maternal Input				paternal Input
	WT	WT	Kcnk9KOmat	Kcnk9KOmat	WT	WT	Kcnk9KOmat	Kcnk9KOmat	WT	WT	Kcnk9KOmat	Kcnk9KOmat	WT	WT	Kcnk9KOmat	Kcnk9KOmat
	DMSO	CI-994	DMSO	CI-994	DMSO	CI-994	DMSO	CI-994	DMSO	CI-994	DMSO	CI-994	DMSO	CI-994	DMSO	CI-994
	58.1994	91.2	72.4804	52.197	41.8006	8.8	27.5196	47.803	52.492	56.0606	50.224	49.4697	47.508	43.9394	49.776	50.5303
	80.3859	85.8	66.1814	70.4545	19.6141	14.2	33.8186	29.5455	45.9807	48.6364	46.9485	58.9394	54.0193	51.3636	53.0515	41.0606
	80.3859	85.9	64.5857	55.6818	19.6141	14.1	35.4143	44.3182	51.5273	51.1364	52.8275	50.9848	48.4727	48.8636	47.1725	49.0152
		79.7	60.3863	69.2424		20.3	39.6137	30.7576		44.1667		43.5606		55.8333		56.4394
			83.9866				16.0134
			63.4099				36.5901
	Allele-specific ChIP - rs 240891437
	Maternal H3K27ac enrichment in the hippocampus (C57BL/6xCast/Ei)F1				Paternal H3K27ac enrichment in the hippocampus (C57BL/6xCast/Ei)F1				maternal Input				paternal Input
	WT	WT	Kcnk9KOmat	Kcnk9KOmat	WT	WT	Kcnk9KOmat	Kcnk9KOmat	WT	WT	Kcnk9KOmat	Kcnk9KOmat	WT	WT	Kcnk9KOmat	Kcnk9KOmat
	DMSO	CI-994	DMSO	CI-994	DMSO	CI-994	DMSO	CI-994	DMSO	CI-994	DMSO	CI-994	DMSO	CI-994	DMSO	CI-994
	61.75	52.2523	54.3	51.4078	38.25	47.7477	45.7	48.5922	49.2325	49.4624	50.7829	46.9613	50.7675	50.5376	49.2171	53.0387
	62.85	52.4893	59.8	50.5825	37.15	47.5107	40.2	49.4175	49.8081	50.8065	50.5694	47.2376	50.1919	49.1935	49.4306	52.7624
	58.95	49.597	59.85	50.5825	41.05	50.403	40.15	49.4175	50.9593	50.1792	48.6477	55.6169	49.0407	49.8208	51.3523	44.3831
		50.3556	62.9			49.6444	37.1	47.1359		49.552		50.1842		50.448		49.8158
			58.95				41.05
			51.1				48.9
														*normalized to input

## Sheet: Suppl. Fig. 1
Suppl. Fig. 1a				Suppl. Fig. 1b				Suppl. Fig. 1c
Open field				Elevated plus maze				Elevated plus maze
Percent in center (%)				Duration in open arms ( % of total time)				Duration in open arms ( % of total time)
WT	Kcnk9KOmat	Kcnk9KOhom		WT	Kcnk9KOmat	Kcnk9KOhom		WT	Kcnk9KOmat	Kcnk9KOhom
40.4	42.3	26.4		23.0933	27.6533	17.1467		240	219	106
33.7	28.9	24.4		6.45333	5.44	29.3067		247	254	272
27.2	27.8	35.6		6.98667	7.01333	0.186667		300	296	300
34.1	39	33.9		0	15.9733	4.93333		270	294	300
37.7	56.5	25.4		0	13.1467	24.9333		237	234	190
27.5	36.1	45.6		5.70667	0.0533333	10.7467		280	243	271
28.8	26.7	29.2		23.6267	0	7.68		94	273	300
45.5	31.8	41.1		9.73333	16.4533	0		177	153	300
31.8	33.5	36.4		24.0267	8.45333	10.2667		203	186	190
42.2	34.4	40		13.0667	26.8533	6.61333		300	136	286
23.6	41.7	28		15.4667	10.4267	13.44		300	289	300
38.2667	30.9	42.1		4.69333	6.66667	11.1733		182	274	300
	32.9	32.5067		17.2	37.4933	13.7333		269		260
	47.8	29.1267		26.72	32.88	4.77333		260		230
	25.5067	40.8733		23.2533	28.9067	8.18667		248		260
		21.9733		14.16	9.94667	5.81333				274
		38.2933		15.2533	17.28	5.28				283
		37.6267		16.7467	18.5867	12.2933				300
		36.1667		17.0667	19.2267	21.2				135
				16.3467	25.52	26.4533				187
				6.88	19.52	21.9733				232
				21.6267	19.5733	15.4667				97
					15.9467	2.96				213
					29.3067	9.54667				270
					25.3867	0				221
					26.5333	22.7733				187
					20.9333	19.3867				264
						10.1067				287
						6.98667				177
						18.5333				224
						23.8133				236
						13.6533
						22.3467
						18.0533
						18.9333

## Sheet: Suppl. Fig. 2
Suppl. Fig. 2a									Suppl. Fig. 2c
Tyrosine hydroxylase fold change expression									LC: Fold change expression (Kcnk9/ Impa2
Locus Coeruleus			Cerebellum			Hippocampus			WT		Kcnk9KOmat
385.688	0.100893		5.73315	0.0423591		0.461135	0.451057		5.71931	0.0451458	0.962221	0.103212
366.392	0.00554623		4.00579	0.0423591		1	0.0534989		7.10142	0.0363519	0.971869	0.0137828
357.803	0.0542441		7.34826	0.0952535		0.5	0.143561		4.91998	0.014682	1.06591	0.152778
504.173	0.0172855		10.483	0.0576115		0.808116	0.467124
448.414	0.097129		5.23876	0.0553869		0.548161	0.548161
460.989	0.0975773

## Sheet: Suppl. Fig. 3
Suppl. Fig. 3a							Suppl. Fig. 3b
PCN dugs show no affect on Kcnk9 expression							Kcnk9 fold change expression after Treatment with CI-994
Log2FC (Kcnk9/Impa2)								DMSO		CI994 20 µM		CI994 80 µM
DMSO		Zebularine		C646			Gene	mean	SD	mean	SD	mean	SD
1.09178	0.0289268	0.887028	0.0221707	1.06673	0.030854		Eif2c2	1	0.0364387	1.05049	0.0139811	2.71792	0.0235789
0.973278	0.00517341	0.927392	0.016655	1.06673	0.030854		Chrac1	1	0.0263267	0.646311	0.0139507	1.084	0.0242654
0.973278	0.0246	0.888456	0.126781	-0.35484	0.235139		Peg13	1	0.0261297	0.442271	0.0182528	1.06049	0.0236788
0.973278	0.0196193			0.414424	0.0149941		Trappc9	1	0.272019	0.337194	0.677621	0.965083	0.608063
0.973278	0.0480861						Kcnk9	1	0.0386558	6.44846	0.0157279	20.87	0.0424074
1.1829	0.0104399
0.832211	0.023155
Suppl. Fig. 3c
PCN after Treatment with CI-994
Neuron density (number per 0.2 mm2)
DMSO	CI-994 10 µM	CI-994 20 µM
39	38.5	58.5
48	20	32.5
41.5	40.5	16.25
56	26.25	31
58.5	28	29
57	42.5	39
50.75	48.25	25.5
29.75	45.25	45
14.5	22	37
42.5
22
32.5

## Sheet: Suppl. Fig. 4
Suppl. Fig. 4b					Suppl. Fig. 4c
Kcnk9 fold change expression after Treatment with CI-994					Kcnk9 fold change expression after Treatment with CI-994
maternal		paternal			Cerebellum		Hypothalamus		Hippocampus
DMSO	CI994	DMSO	CI994		DMSO	CI-994	DMSO	CI-994	DMSO	CI-994
0.49393	1.71981	0.211248	7.79391		0.883058	0.587294	1.07602	1.67096	0.927506	1.85523
0.714583	1.15496	1.16356	4.16904		1.12768	1.00427	1.07504	1.22049	1.09027	0.968508
1.77478	0.468095	0.888628	0.149512		1.92952	0.910558	1.12265	1.31374	0.907944	0.541656
0.715762	1.84264	1.8815	2.22153		0.996354	0.62744	1.03152	0.394255	0.853419	1.04771
0.611107		0.335328			0.873776	0.986398	0.699622	0.905076	0.67525
0.919854		0.544338			0.67326	1.11824	1.04576	1.18811	1.24173
1.85938		1.22926			0.847149	1.16634	1.2314	0.770308	1.2175
0.9106		2.54797			1.0328	1.36255	0.84398	1.31392	0.891882
		0.198164			0.6364	0.986798	0.87401	1.33533	0.617988
						1.32426		1.29939	0.945156
						1.14495		0.986098	0.616469
						1.4246			1.1537
									1.15527
									1.70592

[truncated: 3 more sheets: Suppl. Fig. 5, Suppl. Fig. 6, Suppl. Fig. 7]
